# Supplementary material for: Perfluorooctanoic Acid for Shotgun Proteomics
Source: PLoS One. 2010 Dec 30;5(12):e15332. doi: 10.1371/journal.pone.0015332 (PMC3012695; doi:10.1371/journal.pone.0015332)
Supplement: Table S1 — OS proteins identified. (XLS) [file pone.0015332.s001.xls]

## Sheet: Peptide Report for SK68_no_urea
	Supplemental Table 1: OS Proteins Identified
	75 proteins
	CRITERIA FOR PROTEIN IDENTIFICATION-- Scaffold (version Scaffold_3_00_04, Proteome Software Inc., Portland, OR) was used to validate MS/MS based peptide and protein identifications. Peptide identifications were accepted if they exceeded specific database search engine thresholds. Mascot identifications required at least ion scores must be greater than both the associated identity scores and 20. P…
	SK68_no_urea, Peptide report created on 09/15/2010
	Experiment: SK68_no_urea
	Peak List Generator: extractmsn.exe
	Database Name: SwissProt
	Version: 05_2010
	Taxonomy: Other mammalia
	Number of Proteins: 12636
	Search Engine Set: 1 Search Engine
	Search Engine: Mascot
	Version: Mascot
	Samples: All Samples
	Fragment Tolerance: 1.80 Da (Monoisotopic)
	Parent Tolerance: 10.0 PPM (Monoisotopic)
	Fixed Modifications: +44 on C (Hydroxyethyl)
	Variable Modifications: +16 on M (Oxidation)
	Database: the uniprot_sprot database (selected for Other mammalia, unknown version, 12636 entries)
	Digestion Enzyme: Trypsin
	Max Missed Cleavages: 2
	Scaffold Version: Scaffold_3_00_04
	Peptide Thresholds: 95.0% minimum
	Protein Thresholds: 99.0% minimum and 2 peptides minimum
Biological sample name	Protein name	SwissProt ID	Protein molecular weight (Da)	Protein identification probability	Number of unique peptides	Number of unique spectra	Number of total spectra	Percentage of total spectra	Percentage sequence coverage	Peptide sequence	Previous amino acid	Next amino acid	Best Peptide identification probability	Best Mascot Ion score	Best Mascot Identity score	Number of identified +1H spectra	Number of identified +2H spectra	Number of identified +3H spectra	Number of identified +4H spectra	Number of enzymatic termini	Calculated +1H Peptide Mass (AMU)	Peptide start index	Peptide stop index	Membrane Proteina
SK68	Retinal guanylyl cyclase 1	GUC2D_BOVIN	120354	1	9	11	18	0.00939	0.0946	AAGTTAPVVTPAADALYALLR	R	A	0.95	28.1	16.5	0	1	0	0	2	2042.13	162	182	x
SK68	Retinal guanylyl cyclase 1	GUC2D_BOVIN	120354	1	9	11	18	0.00939	0.0946	AHDAVLTLTR	K	H	0.95	18	17.8	0	0	1	0	2	1096.61	309	318	x
SK68	Retinal guanylyl cyclase 1	GUC2D_BOVIN	120354	1	9	11	18	0.00939	0.0946	ERTEELELEK	R	Q	0.95	39.8	17.9	0	2	0	0	2	1275.64	842	851	x
SK68	Retinal guanylyl cyclase 1	GUC2D_BOVIN	120354	1	9	11	18	0.00939	0.0946	GSLQDLLAQR	R	D	0.95	38	19	0	2	0	0	2	1100.61	630	639	x
SK68	Retinal guanylyl cyclase 1	GUC2D_BOVIN	120354	1	9	11	18	0.00939	0.0946	KAHDAVLTLTR	R	H	0.95	36.9	16.1	0	2	0	0	2	1224.71	308	318	x
SK68	Retinal guanylyl cyclase 1	GUC2D_BOVIN	120354	1	9	11	18	0.00939	0.0946	LNHAAALEGGPR	R	F	0.95	35.3	19	0	1	1	0	2	1205.64	89	100	x
SK68	Retinal guanylyl cyclase 1	GUC2D_BOVIN	120354	1	9	11	18	0.00939	0.0946	SSLLLDLIK	K	G	0.95	47	12.6	0	2	0	0	2	1001.62	649	657	x
SK68	Retinal guanylyl cyclase 1	GUC2D_BOVIN	120354	1	9	11	18	0.00939	0.0946	STVQILSALNEGFLTEVR	R	G	0.95	62	18.8	0	2	2	0	2	1977.07	1028	1045	x
SK68	Retinal guanylyl cyclase 1	GUC2D_BOVIN	120354	1	9	11	18	0.00939	0.0946	TPGSLGAVSSALTR	R	V	0.95	55.8	20.6	0	2	0	0	2	1316.72	112	125	x
SK68	Guanine nucleotide-binding protein G(I)/G(S)/G(T) subunit beta-2	GBB2_BOVIN	37313.8	1	6	9	22	0.0115	0.215	AGVLAGHDNR	R	V	0.95	27.9	19	0	0	2	0	2	1009.52	305	314
SK68	Guanine nucleotide-binding protein G(I)/G(S)/G(T) subunit beta-2	GBB2_BOVIN	37313.8	1	6	9	22	0.0115	0.215	LFDLR	R	A	0.95	27.2	20.2	0	5	0	0	2	663.383	252	256
SK68	Guanine nucleotide-binding protein G(I)/G(S)/G(T) subunit beta-2	GBB2_BOVIN	37313.8	1	6	9	22	0.0115	0.215	LLLAGYDDFNCNIWDAMK	R	G	0.95	36	17.6	0	1	0	0	2	2161.99	284	301
SK68	Guanine nucleotide-binding protein G(I)/G(S)/G(T) subunit beta-2	GBB2_BOVIN	37313.8	1	6	9	22	0.0115	0.215	LLVSASQDGK	R	L	0.95	42.6	19.6	3	3	0	0	2	1017.56	69	78
SK68	Guanine nucleotide-binding protein G(I)/G(S)/G(T) subunit beta-2	GBB2_BOVIN	37313.8	1	6	9	22	0.0115	0.215	VHAIPLR	K	S	0.95	40.9	12	2	2	0	0	2	805.504	90	96
SK68	Guanine nucleotide-binding protein G(I)/G(S)/G(T) subunit beta-2	GBB2_BOVIN	37313.8	1	6	9	22	0.0115	0.215	VSCLGVTDDGMAVATGSWDSFLK	R	I	0.95	95.1	15.8	0	2	2	0	2	2403.12	315	337
SK68	Cytochrome b-c1 complex subunit 1, mitochondrial	QCR1_BOVIN	52717.7	1	3	3	3	0.00157	0.1	DVVFNYLHATAFQGTPLAQSVEGPSENVR	R	K	0.95	43.8	18	0	0	1	0	2	3146.55	181	209	x
SK68	Cytochrome b-c1 complex subunit 1, mitochondrial	QCR1_BOVIN	52717.7	1	3	3	3	0.00157	0.1	MVLAAAGGLEHR	R	Q	0.95	18.1	18.1	0	0	1	0	2	1240.65	229	240	x
SK68	Cytochrome b-c1 complex subunit 1, mitochondrial	QCR1_BOVIN	52717.7	1	3	3	3	0.00157	0.1	SLLTYGR	R	R	0.95	22.8	16.2	0	1	0	0	2	809.452	416	422	x
SK68	NADH-ubiquinone oxidoreductase 75 kDa subunit, mitochondrial	NDUS1_BOVIN	79425.1	1	4	4	5	0.00261	0.0908	FASEIAGVDDLGTTGR	R	G	0.95	67.5	18.1	0	2	0	0	2	1608.79	185	200	x
SK68	NADH-ubiquinone oxidoreductase 75 kDa subunit, mitochondrial	NDUS1_BOVIN	79425.1	1	4	4	5	0.00261	0.0908	IASQVAALDLGYKPGVEAIQK	R	N	0.95	18.4	17	0	0	1	0	2	2171.21	519	539	x
SK68	NADH-ubiquinone oxidoreductase 75 kDa subunit, mitochondrial	NDUS1_BOVIN	79425.1	1	4	4	5	0.00261	0.0908	NDGAAILAAVSNIAQK	R	I	0.95	34.9	19.2	0	1	0	0	2	1555.84	484	499	x
SK68	NADH-ubiquinone oxidoreductase 75 kDa subunit, mitochondrial	NDUS1_BOVIN	79425.1	1	4	4	5	0.00261	0.0908	VALIGSPVDLTYR	K	Y	0.95	30.5	19.5	0	1	0	0	2	1403.79	429	441	x
SK68	Cytochrome c oxidase subunit 5A, mitochondrial	COX5A_BOVIN	16717.4	1	3	3	4	0.00209	0.118	ILEVVKDK	R	A	0.95	24.3	14.1	0	1	0	0	2	943.582	110	117	x
SK68	Cytochrome c oxidase subunit 5A, mitochondrial	COX5A_BOVIN	16717.4	1	3	3	4	0.00209	0.118	LNDFASAVR	R	I	0.95	50.9	18.9	0	2	0	0	2	992.516	101	109	x
SK68	Cytochrome c oxidase subunit 5A, mitochondrial	COX5A_BOVIN	16717.4	1	3	3	4	0.00209	0.118	RLNDFASAVR	R	I	0.95	18	18.9	0	0	1	0	2	1148.62	100	109	x
SK68	Creatine kinase U-type, mitochondrial	KCRU_BOVIN	46880	0.998	2	2	3	0.00157	0.0745	GTGGVDTAATGSVFDISNLDR	R	L	0.95	79.8	17	0	2	0	0	2	2052.98	354	374	x
SK68	Creatine kinase U-type, mitochondrial	KCRU_BOVIN	46880	0.998	2	2	3	0.00157	0.0745	VVVDALSGLK	R	G	0.95	35.3	16.3	0	1	0	0	2	1000.6	190	199	x
SK68	Prohibitin	PHB_BOVIN	29786.6	1	3	3	4	0.00209	0.154	AAELIANSLATAGDGLIELR	K	K	0.95	29.3	17.2	0	1	0	0	2	1998.09	220	239	x
SK68	Prohibitin	PHB_BOVIN	29786.6	1	3	3	4	0.00209	0.154	FDAGELITQR	R	E	0.95	41	18.7	0	2	0	0	2	1149.59	134	143	x
SK68	Prohibitin	PHB_BOVIN	29786.6	1	3	3	4	0.00209	0.154	ILFRPVASQLPR	R	I	0.95	20.4	13	0	0	1	0	2	1396.84	94	105	x
SK68	Voltage-dependent anion-selective channel protein 1	VDAC1_BOVIN,VDAC1_PIG,VDAC1_RABIT	30723.8	1	6	9	18	0.00939	0.276	LTFDSSFSPNTGK	K	K	0.95	69.1	19.3	0	2	0	0	2	1400.67	97	109	x
SK68	Voltage-dependent anion-selective channel protein 1	VDAC1_BOVIN,VDAC1_PIG,VDAC1_RABIT	30723.8	1	6	9	18	0.00939	0.276	LTFDSSFSPNTGKK	K	N	0.95	46	19.7	0	2	0	0	2	1528.76	97	110	x
SK68	Voltage-dependent anion-selective channel protein 1	VDAC1_BOVIN,VDAC1_PIG,VDAC1_RABIT	30723.8	1	6	9	18	0.00939	0.276	LTLSALLDGK	K	N	0.95	23.9	18.1	2	1	0	0	2	1030.61	257	266	x
SK68	Voltage-dependent anion-selective channel protein 1	VDAC1_BOVIN,VDAC1_PIG,VDAC1_RABIT	30723.8	1	6	9	18	0.00939	0.276	TDEFQLHTNVNDGTEFGGSIYQK	K	V	0.95	47.9	15.7	0	0	1	0	2	2600.19	175	197	x
SK68	Voltage-dependent anion-selective channel protein 1	VDAC1_BOVIN,VDAC1_PIG,VDAC1_RABIT	30723.8	1	6	9	18	0.00939	0.276	VNNSSLIGLGYTQTLKPGIK	K	L	0.95	58.8	14.1	0	3	3	0	2	2103.18	237	256	x
SK68	Voltage-dependent anion-selective channel protein 1	VDAC1_BOVIN,VDAC1_PIG,VDAC1_RABIT	30723.8	1	6	9	18	0.00939	0.276	VTQSNFAVGYK	R	T	0.95	45	18.1	2	2	0	0	2	1213.62	164	174	x
SK68	Guanine nucleotide-binding protein G(T) subunit gamma-T1	GBG1_BOVIN	8526	1	5	8	19	0.00992	0.473	CCEEFRDYVEER	K	S	0.95	19.1	3.01	0	0	1	0	2	1665.69	36	47	x
SK68	Guanine nucleotide-binding protein G(T) subunit gamma-T1	GBG1_BOVIN	8526	1	5	8	19	0.00992	0.473	PVINIEDLTEK	M	D	0.95	80.2	17.9	0	4	0	0	1	1270.69	2	12	x
SK68	Guanine nucleotide-binding protein G(T) subunit gamma-T1	GBG1_BOVIN	8526	1	5	8	19	0.00992	0.473	PVINIEDLTEKDK	M	L	0.95	82.9	20.5	0	3	3	0	1	1513.81	2	14	x
SK68	Guanine nucleotide-binding protein G(T) subunit gamma-T1	GBG1_BOVIN	8526	1	5	8	19	0.00992	0.473	PVINIEDLTEKDKLK	M	M	0.95	74.7	15.9	0	2	2	2	1	1754.99	2	16	x
SK68	Guanine nucleotide-binding protein G(T) subunit gamma-T1	GBG1_BOVIN	8526	1	5	8	19	0.00992	0.473	SGEDPLVK	R	G	0.95	43.5	17.3	0	2	0	0	2	844.441	48	55	x
SK68	Red-sensitive opsin	OPSR_BOVIN,OPSR_CAPHI	40566.4	1	3	4	6	0.00313	0.0769	KVDDSSELSSVSK	K	T	0.95	75.5	17.4	0	2	1	0	2	1380.69	340	352	x
SK68	Red-sensitive opsin	OPSR_BOVIN,OPSR_CAPHI	40566.4	1	3	4	6	0.00313	0.0769	SATIYNPIIYVFMNR	K	Q	0.95	34.3	19.4	0	2	0	0	2	1817.93	313	327	x
SK68	Red-sensitive opsin	OPSR_BOVIN,OPSR_CAPHI	40566.4	1	3	4	6	0.00313	0.0769	VDDSSELSSVSK	K	T	0.95	64.5	15.7	0	1	0	0	2	1252.59	341	352	x
SK68	Ras-related protein Rab-11B	RB11B_BOVIN	24471	1	4	4	6	0.00313	0.183	GAVGALLVYDIAK	R	H	0.95	65.4	16.2	0	2	0	0	2	1289.75	83	95	x
SK68	Ras-related protein Rab-11B	RB11B_BOVIN	24471	1	4	4	6	0.00313	0.183	HLTYENVER	K	W	0.95	27	17.1	0	1	0	0	2	1160.57	96	104	x
SK68	Ras-related protein Rab-11B	RB11B_BOVIN	24471	1	4	4	6	0.00313	0.183	NILTEIYR	K	I	0.95	27.7	17.6	0	1	0	0	2	1021.57	167	174	x
SK68	Ras-related protein Rab-11B	RB11B_BOVIN	24471	1	4	4	6	0.00313	0.183	STIGVEFATR	K	S	0.95	53.2	18.2	0	2	0	0	2	1080.57	42	51	x
SK68	Sodium/potassium/calcium exchanger 1	NCKX1_BOVIN	131598	1	5	6	9	0.0047	0.0518	AENESEGDIPAER	K	R	0.95	55.5	10	0	2	0	0	2	1416.62	780	792	x
SK68	Sodium/potassium/calcium exchanger 1	NCKX1_BOVIN	131598	1	5	6	9	0.0047	0.0518	DKEEETLIPEAK	K	A	0.95	43.6	19.4	0	2	0	0	2	1401.71	684	695	x
SK68	Sodium/potassium/calcium exchanger 1	NCKX1_BOVIN	131598	1	5	6	9	0.0047	0.0518	DLFSVEER	R	R	0.95	26.1	18	1	1	0	0	2	994.484	437	444	x
SK68	Sodium/potassium/calcium exchanger 1	NCKX1_BOVIN	131598	1	5	6	9	0.0047	0.0518	SGGDAALGGESEGK	R	A	0.95	57.6	11.5	0	2	0	0	2	1234.55	766	779	x
SK68	Sodium/potassium/calcium exchanger 1	NCKX1_BOVIN	131598	1	5	6	9	0.0047	0.0518	TGGEAEAPAEGENGER	R	S	0.95	46	9.03	0	1	0	0	2	1573.67	750	765	x
SK68	Actin, cytoplasmic 1	ACTB_BOVIN,ACTB_CAMDR,ACTB_CANFA,ACTB_HORSE,ACTB_PIG,ACTB_SHEEP,ACTB_TRIVU,ACTG_BOVIN,ACTG_TRIVU	41719.8	1	6	7	11	0.00574	0.163	AGFAGDDAPR	K	A	0.95	36.5	16.6	0	2	0	0	2	976.448	19	28
SK68	Actin, cytoplasmic 1	ACTB_BOVIN,ACTB_CAMDR,ACTB_CANFA,ACTB_HORSE,ACTB_PIG,ACTB_SHEEP,ACTB_TRIVU,ACTG_BOVIN,ACTG_TRIVU	41719.8	1	6	7	11	0.00574	0.163	AVFPSIVGRPR	R	H	0.95	30.5	17.3	0	1	0	0	2	1198.71	29	39
SK68	Actin, cytoplasmic 1	ACTB_BOVIN,ACTB_CAMDR,ACTB_CANFA,ACTB_HORSE,ACTB_PIG,ACTB_SHEEP,ACTB_TRIVU,ACTG_BOVIN,ACTG_TRIVU	41719.8	1	6	7	11	0.00574	0.163	DSYVGDEAQSK	K	R	0.95	35.2	14.6	0	1	0	0	2	1198.52	51	61
SK68	Actin, cytoplasmic 1	ACTB_BOVIN,ACTB_CAMDR,ACTB_CANFA,ACTB_HORSE,ACTB_PIG,ACTB_SHEEP,ACTB_TRIVU,ACTG_BOVIN,ACTG_TRIVU	41719.8	1	6	7	11	0.00574	0.163	DSYVGDEAQSKR	K	G	0.95	54.2	18.8	0	2	0	0	2	1354.62	51	62
SK68	Actin, cytoplasmic 1	ACTB_BOVIN,ACTB_CAMDR,ACTB_CANFA,ACTB_HORSE,ACTB_PIG,ACTB_SHEEP,ACTB_TRIVU,ACTG_BOVIN,ACTG_TRIVU	41719.8	1	6	7	11	0.00574	0.163	GYSFTTTAER	R	E	0.95	63.2	17.1	0	2	0	0	2	1132.53	197	206
SK68	Actin, cytoplasmic 1	ACTB_BOVIN,ACTB_CAMDR,ACTB_CANFA,ACTB_HORSE,ACTB_PIG,ACTB_SHEEP,ACTB_TRIVU,ACTG_BOVIN,ACTG_TRIVU	41719.8	1	6	7	11	0.00574	0.163	VAPEEHPVLLTEAPLNPK	R	A	0.95	50.4	17.5	0	2	1	0	2	1954.06	96	113
SK68	Rod outer segment membrane protein 1	ROM1_BOVIN	37401.1	1	5	9	22	0.0115	0.0997	APVLPLVLPLQPR	M	I	0.95	28.9	6.02	2	4	0	0	1	1412.9	2	14	x
SK68	Rod outer segment membrane protein 1	ROM1_BOVIN	37401.1	1	5	9	22	0.0115	0.0997	LLDELQLR	R	H	0.95	59.4	17.6	1	3	0	0	2	999.583	158	165	x
SK68	Rod outer segment membrane protein 1	ROM1_BOVIN	37401.1	1	5	9	22	0.0115	0.0997	MAPVLPLVLPLQPR	-	I	0.95	30.6	12.8	0	1	0	0	2	1559.93	1	14	x
SK68	Rod outer segment membrane protein 1	ROM1_BOVIN	37401.1	1	5	9	22	0.0115	0.0997	RLLDELQLR	K	H	0.95	47	18.6	0	2	2	0	2	1155.68	157	165	x
SK68	Rod outer segment membrane protein 1	ROM1_BOVIN	37401.1	1	5	9	22	0.0115	0.0997	YLDPNDPDVVDR	R	I	0.95	50.1	16.3	3	4	0	0	2	1417.66	187	198	x
SK68	Recoverin	RECO_BOVIN	23316.6	1	7	8	12	0.00626	0.327	AYAQHVFR	K	S	0.95	20.9	17.9	0	1	1	0	2	991.511	64	71
SK68	Recoverin	RECO_BOVIN	23316.6	1	7	8	12	0.00626	0.327	EFIEGTLANK	K	E	0.95	34.2	23.4	0	2	0	0	2	1121.58	171	180
SK68	Recoverin	RECO_BOVIN	23316.6	1	7	8	12	0.00626	0.327	EILEELQLNTK	K	F	0.95	52.1	18.9	0	2	0	0	2	1329.73	12	22
SK68	Recoverin	RECO_BOVIN	23316.6	1	7	8	12	0.00626	0.327	HLPEDENTPEK	K	R	0.95	27	15.8	0	1	0	0	2	1308.61	140	150
SK68	Recoverin	RECO_BOVIN	23316.6	1	7	8	12	0.00626	0.327	HLPEDENTPEKR	K	A	0.95	29.5	18.5	0	0	2	0	2	1464.71	140	151
SK68	Recoverin	RECO_BOVIN	23316.6	1	7	8	12	0.00626	0.327	NEVLEIVTAIFK	K	M	0.95	68.2	17.3	0	2	0	0	2	1375.78	120	131
SK68	Recoverin	RECO_BOVIN	23316.6	1	7	8	12	0.00626	0.327	SFDANSDGTLDFK	R	E	0.95	32.3	13	0	1	0	0	2	1416.63	72	84
SK68	Heat shock cognate 71 kDa protein	HSP7C_BOVIN,HSP7C_HORSE	71224.2	1	4	4	7	0.00365	0.0677	ARFEELNADLFR	R	G	0.95	32.1	19.4	0	0	2	0	2	1480.75	300	311
SK68	Heat shock cognate 71 kDa protein	HSP7C_BOVIN,HSP7C_HORSE	71224.2	1	4	4	7	0.00365	0.0677	LSKEDIER	R	M	0.95	23.8	20.3	0	0	2	0	2	989.526	510	517
SK68	Heat shock cognate 71 kDa protein	HSP7C_BOVIN,HSP7C_HORSE	71224.2	1	4	4	7	0.00365	0.0677	TTPSYVAFTDTER	R	L	0.95	26.8	17.9	0	1	0	0	2	1487.7	37	49
SK68	Heat shock cognate 71 kDa protein	HSP7C_BOVIN,HSP7C_HORSE	71224.2	1	4	4	7	0.00365	0.0677	VEIIANDQGNR	K	T	0.95	39.1	18.9	0	2	0	0	2	1228.63	26	36
SK68	ADP/ATP translocase 3	ADT3_BOVIN,ADT3_PIG	32860.4	1	5	8	14	0.00731	0.151	DFLAGGIAAAISK	K	T	0.95	71.1	19.9	2	2	0	0	2	1233.68	11	23	x
SK68	ADP/ATP translocase 3	ADT3_BOVIN,ADT3_PIG	32860.4	1	5	8	14	0.00731	0.151	GNLANVIR	R	Y	0.95	29.2	18.3	0	1	0	0	2	856.5	73	80	x
SK68	ADP/ATP translocase 3	ADT3_BOVIN,ADT3_PIG	32860.4	1	5	8	14	0.00731	0.151	LLLQVQHASK	K	Q	0.95	26.5	15.6	0	3	0	0	2	1136.68	34	43	x
SK68	ADP/ATP translocase 3	ADT3_BOVIN,ADT3_PIG	32860.4	1	5	8	14	0.00731	0.151	VKLLLQVQHASK	R	Q	0.95	20.5	10.8	0	0	1	1	2	1363.84	32	43	x
SK68	ADP/ATP translocase 3	ADT3_BOVIN,ADT3_PIG	32860.4	1	5	8	14	0.00731	0.151	YFPTQALNFAFK	R	D	0.95	58.6	19.5	1	3	0	0	2	1446.74	81	92	x
SK68	NADH dehydrogenase [ubiquinone] 1 subunit C2	NDUC2_BOVIN	14079	0.998	2	2	3	0.00157	0.2	ATFQFLPDEAR	R	S	0.95	32.5	18.2	0	2	0	0	2	1294.64	9	19	x
SK68	NADH dehydrogenase [ubiquinone] 1 subunit C2	NDUC2_BOVIN	14079	0.998	2	2	3	0.00157	0.2	TYGEVFEEFHPVR	K	-	0.95	17.9	17.4	0	0	1	0	2	1609.76	108	120	x
SK68	Rhodopsin	OPSD_BOVIN	38990	1	5	10	53	0.0277	0.149	EAAAQQQESATTQK	K	A	0.95	85	18.5	0	4	1	0	2	1490.71	232	245	x
SK68	Rhodopsin	OPSD_BOVIN	38990	1	5	10	53	0.0277	0.149	NPLGDDEASTTVSK	K	T	0.95	84.1	17.3	0	23	1	0	2	1433.68	326	339	x
SK68	Rhodopsin	OPSD_BOVIN	38990	1	5	10	53	0.0277	0.149	NPLGDDEASTTVSKTETSQVAPA	K	-	0.95	60.7	18.1	0	2	1	0	2	2318.1	326	348	x
SK68	Rhodopsin	OPSD_BOVIN	38990	1	5	10	53	0.0277	0.149	TETSQVAPA	K	-	0.95	44.7	17.7	8	2	0	0	2	903.442	340	348	x
SK68	Rhodopsin	OPSD_BOVIN	38990	1	5	10	53	0.0277	0.149	TSAVYNPVIYIMMNK	K	Q	0.95	75.1	18.8	0	8	3	0	2	1775.87	297	311	x
SK68	NADH dehydrogenase [ubiquinone] 1 beta subcomplex subunit 10	NDUBA_BOVIN	20946.9	0.998	2	2	3	0.00157	0.142	AFDLLVDRPVTLVR	K	E	0.95	28.3	15.3	0	0	2	0	2	1613.94	36	49	x
SK68	NADH dehydrogenase [ubiquinone] 1 beta subcomplex subunit 10	NDUBA_BOVIN	20946.9	0.998	2	2	3	0.00157	0.142	YHDLGAHYSAR	R	K	0.95	25.6	15.2	0	0	1	0	2	1289.6	143	153	x
SK68	Voltage-dependent anion-selective channel protein 3	VDAC3_BOVIN,VDAC3_PIG,VDAC3_RABIT	30722.2	1	2	2	4	0.00209	0.12	LSQNNFALGYK	K	A	0.95	27.7	19.9	0	2	0	0	2	1254.65	164	174	x
SK68	Voltage-dependent anion-selective channel protein 3	VDAC3_BOVIN,VDAC3_PIG,VDAC3_RABIT	30722.2	1	2	2	4	0.00209	0.12	LTLDTIFVPNTGK	K	K	0.95	50.8	19.5	0	2	0	0	2	1418.79	97	109	x
SK68	Voltage-dependent anion-selective channel protein 3	VDAC3_BOVIN,VDAC3_PIG,VDAC3_RABIT	30722.2	1	2	2	4	0.00209	0.12	LTLSALIDGK	K	N	0.95	23.9	18.1	2	1	0	0	2	1030.61	257	266	x
SK68	Guanine nucleotide-binding protein G(t) subunit alpha-1	GNAT1_BOVIN,GNAT1_CANFA	39949.1	1	9	13	53	0.0277	0.309	AMTTLNIQYGDSAR	R	Q	0.95	73.3	18.3	0	2	0	0	2	1556.74	83	96	x
SK68	Guanine nucleotide-binding protein G(t) subunit alpha-1	GNAT1_BOVIN,GNAT1_CANFA	39949.1	1	9	13	53	0.0277	0.309	ASEYQLNDSAGYYLSDLER	R	L	0.95	79.6	14.8	0	4	0	0	2	2193.99	139	157	x
SK68	Guanine nucleotide-binding protein G(t) subunit alpha-1	GNAT1_BOVIN,GNAT1_CANFA	39949.1	1	9	13	53	0.0277	0.309	FVFDAVTDIIIK	K	E	0.95	71.8	17.3	0	19	2	0	2	1380.78	330	341	x
SK68	Guanine nucleotide-binding protein G(t) subunit alpha-1	GNAT1_BOVIN,GNAT1_CANFA	39949.1	1	9	13	53	0.0277	0.309	FVFDAVTDIIIKENLK	K	D	0.95	87.4	18.1	0	1	0	0	2	1865.04	330	345	x
SK68	Guanine nucleotide-binding protein G(t) subunit alpha-1	GNAT1_BOVIN,GNAT1_CANFA	39949.1	1	9	13	53	0.0277	0.309	LLLLGAGESGK	K	S	0.95	55.7	18.6	4	2	0	0	2	1057.63	32	42	x
SK68	Guanine nucleotide-binding protein G(t) subunit alpha-1	GNAT1_BOVIN,GNAT1_CANFA	39949.1	1	9	13	53	0.0277	0.309	LVTPGYVPTEQDVLR	R	S	0.95	65.8	17.6	0	4	3	0	2	1686.91	158	172	x
SK68	Guanine nucleotide-binding protein G(t) subunit alpha-1	GNAT1_BOVIN,GNAT1_CANFA	39949.1	1	9	13	53	0.0277	0.309	MFDVGGQR	R	S	0.95	28.8	15.3	0	2	0	0	2	925.42	194	201	x
SK68	Guanine nucleotide-binding protein G(t) subunit alpha-1	GNAT1_BOVIN,GNAT1_CANFA	39949.1	1	9	13	53	0.0277	0.309	TTGIIETQFSFK	K	D	0.95	65.7	18.9	0	6	1	0	2	1371.72	177	188	x
SK68	Guanine nucleotide-binding protein G(t) subunit alpha-1	GNAT1_BOVIN,GNAT1_CANFA	39949.1	1	9	13	53	0.0277	0.309	YFATTSIVLFLNK	R	K	0.95	79	19.1	0	3	0	0	2	1516.84	254	266	x
SK68	Elongation factor 1-alpha 1	EF1A1_BOVIN,EF1A1_FELCA,EF1A1_HORSE,EF1A1_RABIT	50123.2	1	5	5	10	0.00522	0.13	EHALLAYTLGVK	R	Q	0.95	28.3	20.6	0	2	0	0	2	1314.74	135	146
SK68	Elongation factor 1-alpha 1	EF1A1_BOVIN,EF1A1_FELCA,EF1A1_HORSE,EF1A1_RABIT	50123.2	1	5	5	10	0.00522	0.13	IGGIGTVPVGR	K	V	0.95	76.3	15.6	0	2	0	0	2	1025.61	256	266
SK68	Elongation factor 1-alpha 1	EF1A1_BOVIN,EF1A1_FELCA,EF1A1_HORSE,EF1A1_RABIT	50123.2	1	5	5	10	0.00522	0.13	STTTGHLIYK	K	C	0.95	29.6	19.1	0	2	0	0	2	1120.6	21	30
SK68	Elongation factor 1-alpha 1	EF1A1_BOVIN,EF1A1_FELCA,EF1A1_HORSE,EF1A1_RABIT	50123.2	1	5	5	10	0.00522	0.13	THINIVVIGHVDSGK	K	S	0.95	29.8	18.5	0	0	2	0	2	1588.88	6	20
SK68	Elongation factor 1-alpha 1	EF1A1_BOVIN,EF1A1_FELCA,EF1A1_HORSE,EF1A1_RABIT	50123.2	1	5	5	10	0.00522	0.13	YYVTIIDAPGHR	K	D	0.95	35	20.7	0	0	2	0	2	1404.73	85	96
SK68	Guanine nucleotide-binding protein G(o) subunit alpha	GNAO_BOVIN	40050	1	4	5	7	0.00365	0.155	IIHEDGFSGEDVK	K	Q	0.95	20.6	16.5	0	0	1	0	2	1445.69	55	67
SK68	Guanine nucleotide-binding protein G(o) subunit alpha	GNAO_BOVIN	40050	1	4	5	7	0.00365	0.155	LLLLGAGESGK	K	S	0.95	55.7	18.6	4	2	0	0	2	1057.63	36	46
SK68	Guanine nucleotide-binding protein G(o) subunit alpha	GNAO_BOVIN	40050	1	4	5	7	0.00365	0.155	NLKEDGISAAK	K	D	0.95	31.1	19.8	0	1	2	0	2	1145.62	22	32
SK68	Guanine nucleotide-binding protein G(o) subunit alpha	GNAO_BOVIN	40050	1	4	5	7	0.00365	0.155	TTGIVETHFTFK	K	N	0.95	31.1	18.8	0	2	0	0	2	1380.72	182	193
SK68	Guanine nucleotide-binding protein G(o) subunit alpha	GNAO_BOVIN	40050	1	4	5	7	0.00365	0.155	YYLDSLDR	K	I	0.95	24.8	14.6	0	1	0	0	2	1044.5	155	162
SK68	Retinol-binding protein 3	RET3_BOVIN	139680	1	9	10	16	0.00835	0.104	ALVDSVFQVSVLPGNVGYLR	R	F	0.95	26.3	18.1	0	1	0	0	2	2133.17	422	441
SK68	Retinol-binding protein 3	RET3_BOVIN	139680	1	9	10	16	0.00835	0.104	LNAGLQAVSEDPR	K	L	0.95	40.3	18.8	0	2	0	0	2	1369.71	372	384
SK68	Retinol-binding protein 3	RET3_BOVIN	139680	1	9	10	16	0.00835	0.104	LQVQVVRPK	R	E	0.95	25	12	0	0	1	0	2	1066.67	385	393
SK68	Retinol-binding protein 3	RET3_BOVIN	139680	1	9	10	16	0.00835	0.104	LVADNYASPELGVK	K	M	0.95	87.7	20.1	0	2	0	0	2	1475.77	945	958
SK68	Retinol-binding protein 3	RET3_BOVIN	139680	1	9	10	16	0.00835	0.104	LVISYEPSTLEAPPR	R	A	0.95	45.3	19.2	0	2	0	0	2	1671.9	87	101
SK68	Retinol-binding protein 3	RET3_BOVIN	139680	1	9	10	16	0.00835	0.104	SLGELVEGTGR	R	L	0.95	42.2	18.8	0	2	0	0	2	1117.58	633	643
SK68	Retinol-binding protein 3	RET3_BOVIN	139680	1	9	10	16	0.00835	0.104	TGGVAEDIAYILK	R	Q	0.95	39.3	19.1	0	1	0	0	2	1349.73	235	247
SK68	Retinol-binding protein 3	RET3_BOVIN	139680	1	9	10	16	0.00835	0.104	VTSEAALAELLQADLQVLSGDPHLK	R	T	0.95	25.8	17.9	0	0	0	1	2	2618.4	973	997
SK68	Retinol-binding protein 3	RET3_BOVIN	139680	1	9	10	16	0.00835	0.104	YSADKDVVVLTSSR	K	T	0.95	70.6	18.7	0	2	2	0	2	1539.8	221	234
SK68	Tubulin beta-2B chain	TBB2B_BOVIN	49935.1	1	3	3	3	0.00157	0.234	ALTVPELTQQMFDSK	R	N	0.95	36.6	17.2	0	1	0	0	2	1723.86	283	297
SK68	Tubulin beta-2B chain	TBB2B_BOVIN	49935.1	1	3	3	3	0.00157	0.234	EVDEQMLNVQNK	K	N	0.95	75.8	17.6	0	2	0	0	2	1462.68	325	336
SK68	Tubulin beta-2B chain	TBB2B_BOVIN	49935.1	1	3	3	3	0.00157	0.234	FPGQLNADLR	R	K	0.95	51.2	19.1	0	2	0	0	2	1130.6	242	251
SK68	Tubulin beta-2B chain	TBB2B_BOVIN	49935.1	1	3	3	3	0.00157	0.234	GHYTEGAELVDSVLDVVR	K	K	0.95	94	19.9	0	2	2	0	2	1958.98	104	121
SK68	Tubulin beta-2B chain	TBB2B_BOVIN	49935.1	1	3	3	3	0.00157	0.234	GHYTEGAELVDSVLDVVRK	K	E	0.95	33.6	19.1	0	0	1	0	2	2087.08	104	122
SK68	Tubulin beta-2B chain	TBB2B_BOVIN	49935.1	1	3	3	3	0.00157	0.234	INVYYNEATGNK	R	Y	0.95	43.3	19.1	0	1	0	0	2	1385.67	47	58
SK68	Tubulin beta-2B chain	TBB2B_BOVIN	49935.1	1	3	3	3	0.00157	0.234	ISEQFTAMFR	R	R	0.95	30.5	16.8	0	1	0	0	2	1245.59	381	390
SK68	Tubulin beta-2B chain	TBB2B_BOVIN	49935.1	1	3	3	3	0.00157	0.234	MSATFIGNSTAIQELFK	K	R	0.95	48.8	18.6	0	1	0	0	2	1873.94	363	379
SK68	Tubulin beta-2B chain	TBB2B_BOVIN	49935.1	1	3	3	3	0.00157	0.234	YLTVAAIFR	R	G	0.95	40.5	15.9	0	1	0	0	2	1053.61	310	318
SK68	Hemoglobin subunit alpha-1	HBA1_BOSMU,HBA_BOVIN	15026.4	0.997	2	2	2	0.00104	0.262	AVEHLDDLPGALSELSDLHAHK	K	L	0.95	35	19.1	0	0	0	0	2	2367.19	69	90
SK68	Hemoglobin subunit alpha-1	HBA1_BOSMU,HBA_BOVIN	15026.4	0.997	2	2	2	0.00104	0.262	VGGHAAEYGAEALER	K	M	0.949	17.7	19	0	0	1	0	2	1529.73	17	31
SK68	Syntaxin-binding protein 1	STXB1_BOVIN	67553.8	1	4	4	7	0.00365	0.0707	HIAEVSQEVTR	K	S	0.95	30.7	19.8	0	2	0	0	2	1268.66	295	305	x
SK68	Syntaxin-binding protein 1	STXB1_BOVIN	67553.8	1	4	4	7	0.00365	0.0707	ISEQTYQLSR	R	W	0.95	57.1	19.2	0	2	0	0	2	1224.62	468	477	x
SK68	Syntaxin-binding protein 1	STXB1_BOVIN	67553.8	1	4	4	7	0.00365	0.0707	SQLLILDR	R	G	0.95	32.2	18.8	0	1	0	0	2	957.573	228	235	x
SK68	Syntaxin-binding protein 1	STXB1_BOVIN	67553.8	1	4	4	7	0.00365	0.0707	SSASFSTTAVSAR	R	Y	0.95	71.2	16.8	0	2	0	0	2	1271.62	506	518	x
SK68	ATP synthase subunit O, mitochondrial	ATPO_BOVIN,ATPO_PIG	23302.2	1	3	3	4	0.00209	0.197	FSPLTSNLINLLAENGR	K	L	0.95	24.4	19.3	0	0	1	0	2	1859	101	117	x
SK68	ATP synthase subunit O, mitochondrial	ATPO_BOVIN,ATPO_PIG	23302.2	1	3	3	4	0.00209	0.197	LVRPPVQIYGIEGR	K	Y	0.95	25.9	17.2	0	0	1	0	2	1596.92	27	40	x
SK68	ATP synthase subunit O, mitochondrial	ATPO_BOVIN,ATPO_PIG	23302.2	1	3	3	4	0.00209	0.197	YATALYSAASK	R	Q	0.95	32.8	19	0	2	0	0	2	1145.58	41	51	x
SK68	Prohibitin-2	PHB2_BOVIN	33340.8	0.999	2	2	3	0.00157	0.0736	FNASQLITQR	K	A	0.95	28.3	21.4	0	1	0	0	2	1177.63	148	157	x
SK68	Prohibitin-2	PHB2_BOVIN	33340.8	0.999	2	2	3	0.00157	0.0736	IVQAEGEAEAAR	K	M	0.95	48.2	17.2	0	2	0	0	2	1243.63	225	236	x
SK68	Tubulin beta-3 chain	TBB3_BOVIN	50414.7	0.998	2	2	3	0.00157	0.187	ALTVPELTQQMFDAK	R	N	0.95	30.4	19.2	0	2	0	0	2	1707.86	283	297
SK68	Tubulin beta-3 chain	TBB3_BOVIN	50414.7	0.998	2	2	3	0.00157	0.187	FPGQLNADLR	R	K	0.95	51.2	19.1	0	2	0	0	2	1130.6	242	251
SK68	Tubulin beta-3 chain	TBB3_BOVIN	50414.7	0.998	2	2	3	0.00157	0.187	GHYTEGAELVDSVLDVVR	K	K	0.95	94	19.9	0	2	2	0	2	1958.98	104	121
SK68	Tubulin beta-3 chain	TBB3_BOVIN	50414.7	0.998	2	2	3	0.00157	0.187	GHYTEGAELVDSVLDVVRK	K	E	0.95	33.6	19.1	0	0	1	0	2	2087.08	104	122
SK68	Tubulin beta-3 chain	TBB3_BOVIN	50414.7	0.998	2	2	3	0.00157	0.187	IMNTFSVVPSPK	R	V	0.95	37.6	19.7	0	2	0	0	2	1335.7	163	174
SK68	Tubulin beta-3 chain	TBB3_BOVIN	50414.7	0.998	2	2	3	0.00157	0.187	ISEQFTAMFR	R	R	0.95	30.5	16.8	0	1	0	0	2	1245.59	381	390
SK68	Tubulin beta-3 chain	TBB3_BOVIN	50414.7	0.998	2	2	3	0.00157	0.187	MSSTFIGNSTAIQELFK	K	R	0.95	82	19.1	0	1	0	0	2	1889.93	363	379
SK68	Tubulin beta-3 chain	TBB3_BOVIN	50414.7	0.998	2	2	3	0.00157	0.187	MSSTFIGNSTAIQELFKR	K	I	0.95	24	18.6	0	0	2	0	2	2046.03	363	380
SK68	Sodium/potassium-transporting ATPase subunit alpha-1	AT1A1_BOVIN,AT1A1_PIG,AT1A1_SHEEP	112628	1	7	8	13	0.00678	0.0979	DKYEPAAVSEHGDKK	R	K	0.95	21.9	18.5	0	0	0	2	2	1673.81	8	22	x
SK68	Sodium/potassium-transporting ATPase subunit alpha-1	AT1A1_BOVIN,AT1A1_PIG,AT1A1_SHEEP	112628	1	7	8	13	0.00678	0.0979	GVGIISEGNETVEDIAAR	K	L	0.95	98	19	0	2	1	0	2	1829.92	628	645	x
SK68	Sodium/potassium-transporting ATPase subunit alpha-1	AT1A1_BOVIN,AT1A1_PIG,AT1A1_SHEEP	112628	1	7	8	13	0.00678	0.0979	LIFDNLKK	R	S	0.95	22.6	17.1	0	0	2	0	2	990.598	765	772	x
SK68	Sodium/potassium-transporting ATPase subunit alpha-1	AT1A1_BOVIN,AT1A1_PIG,AT1A1_SHEEP	112628	1	7	8	13	0.00678	0.0979	LSLDELHR	K	K	0.95	26.3	17.6	0	0	2	0	2	982.532	44	51	x
SK68	Sodium/potassium-transporting ATPase subunit alpha-1	AT1A1_BOVIN,AT1A1_PIG,AT1A1_SHEEP	112628	1	7	8	13	0.00678	0.0979	QAADMILLDDNFASIVTGVEEGR	K	L	0.95	50.3	19.3	0	1	0	0	2	2480.2	742	764	x
SK68	Sodium/potassium-transporting ATPase subunit alpha-1	AT1A1_BOVIN,AT1A1_PIG,AT1A1_SHEEP	112628	1	7	8	13	0.00678	0.0979	SPDFTNENPLETR	R	N	0.95	68.8	15.6	0	1	0	0	2	1519.7	226	238	x
SK68	Sodium/potassium-transporting ATPase subunit alpha-1	AT1A1_BOVIN,AT1A1_PIG,AT1A1_SHEEP	112628	1	7	8	13	0.00678	0.0979	VDNSSLTGESEPQTR	K	S	0.95	69.8	18.1	0	2	0	0	2	1619.75	211	225	x
SK68	Peripherin-2	PRPH2_BOVIN	38975.3	1	6	7	16	0.00835	0.186	AFLESVK	K	K	0.95	29.6	16.8	0	2	0	0	2	793.445	317	323	x
SK68	Peripherin-2	PRPH2_BOVIN	38975.3	1	6	7	16	0.00835	0.186	FYRDTDTPGR	K	C	0.95	29	15.9	0	0	2	0	2	1227.58	139	148	x
SK68	Peripherin-2	PRPH2_BOVIN	38975.3	1	6	7	16	0.00835	0.186	GNQVEAEGEDAGQAPAAG	K	-	0.95	75.4	11.5	0	3	0	0	2	1670.73	328	345	x
SK68	Peripherin-2	PRPH2_BOVIN	38975.3	1	6	7	16	0.00835	0.186	GSLESTLAHGLK	R	N	0.95	50.7	18.2	0	2	2	0	2	1212.66	123	134	x
SK68	Peripherin-2	PRPH2_BOVIN	38975.3	1	6	7	16	0.00835	0.186	TIDMLQIEFK	K	C	0.95	53.5	18.3	0	2	0	0	2	1253.64	154	163	x
SK68	Peripherin-2	PRPH2_BOVIN	38975.3	1	6	7	16	0.00835	0.186	YLDFSSK	R	E	0.95	30.9	17.3	3	0	0	0	2	859.42	183	189	x
SK68	cGMP-gated cation channel alpha-1	CNGA1_BOVIN	79588.4	1	5	7	12	0.00626	0.117	DGLLDINIANAGSDPK	K	D	0.95	95.3	20.1	0	2	0	0	2	1612.82	604	619	x
SK68	cGMP-gated cation channel alpha-1	CNGA1_BOVIN	79588.4	1	5	7	12	0.00626	0.117	FLKPLIDTEFSAIEGSGTESGPTDSTQD	K	-	0.95	60.5	14.9	0	1	1	0	2	2942.38	663	690	x
SK68	cGMP-gated cation channel alpha-1	CNGA1_BOVIN	79588.4	1	5	7	12	0.00626	0.117	LDVLSVIPTDLLYIK	K	F	0.95	44.5	13.8	0	2	1	0	2	1702	246	260	x
SK68	cGMP-gated cation channel alpha-1	CNGA1_BOVIN	79588.4	1	5	7	12	0.00626	0.117	MESSVDLLQTR	R	F	0.95	50.2	17.9	0	2	0	0	2	1294.63	628	638	x
SK68	cGMP-gated cation channel alpha-1	CNGA1_BOVIN	79588.4	1	5	7	12	0.00626	0.117	TGYLEQGLLVK	R	E	0.95	47.1	17.1	0	3	0	0	2	1220.69	219	229	x
SK68	Excitatory amino acid transporter 1	EAA1_BOVIN	59574.9	1	3	3	4	0.00209	0.0904	IVQVTAADAFLDLIR	K	N	0.95	77.9	17.3	0	2	0	0	2	1644.93	161	175	x
SK68	Excitatory amino acid transporter 1	EAA1_BOVIN	59574.9	1	3	3	4	0.00209	0.0904	KPYQLISQESEIEK	K	S	0.95	22.7	19.2	0	0	1	0	2	1691.89	521	534	x
SK68	Excitatory amino acid transporter 1	EAA1_BOVIN	59574.9	1	3	3	4	0.00209	0.0904	TTTNVLGDSLGAGIVEHLSR	R	H	0.949	17.7	19.1	0	0	1	0	2	2040.07	480	499	x
SK68	Tubulin alpha-1B chain	TBA1B_BOVIN,TBA1B_PIG	50133.7	1	11	16	40	0.0209	0.339	AVFVDLEPTVIDEVR	R	T	0.95	57.2	19.6	0	2	2	0	2	1701.91	65	79
SK68	Tubulin alpha-1B chain	TBA1B_BOVIN,TBA1B_PIG	50133.7	1	11	16	40	0.0209	0.339	DVNAAIATIK	K	T	0.95	61.3	20.1	4	3	0	0	2	1015.58	327	336
SK68	Tubulin alpha-1B chain	TBA1B_BOVIN,TBA1B_PIG	50133.7	1	11	16	40	0.0209	0.339	FDGALNVDLTEFQTNLVPYPR	R	I	0.95	83	20	0	4	2	0	2	2409.21	244	264
SK68	Tubulin alpha-1B chain	TBA1B_BOVIN,TBA1B_PIG	50133.7	1	11	16	40	0.0209	0.339	GHYTIGKEIIDLVLDR	R	I	0.95	19	17.1	0	0	2	0	2	1842.01	106	121
SK68	Tubulin alpha-1B chain	TBA1B_BOVIN,TBA1B_PIG	50133.7	1	11	16	40	0.0209	0.339	GHYTIGKEIIDLVLDRIR	R	K	0.95	34.3	14.8	0	0	0	2	2	2111.2	106	123
SK68	Tubulin alpha-1B chain	TBA1B_BOVIN,TBA1B_PIG	50133.7	1	11	16	40	0.0209	0.339	IHFPLATYAPVISAEK	R	A	0.95	62.5	17.6	0	3	2	0	2	1756.96	265	280
SK68	Tubulin alpha-1B chain	TBA1B_BOVIN,TBA1B_PIG	50133.7	1	11	16	40	0.0209	0.339	LISQIVSSITASLR	R	F	0.95	74.1	16.3	0	4	1	0	2	1487.88	230	243
SK68	Tubulin alpha-1B chain	TBA1B_BOVIN,TBA1B_PIG	50133.7	1	11	16	40	0.0209	0.339	LSVDYGK	R	K	0.95	32.6	17.7	2	0	0	0	2	781.409	157	163
SK68	Tubulin alpha-1B chain	TBA1B_BOVIN,TBA1B_PIG	50133.7	1	11	16	40	0.0209	0.339	NLDIERPTYTNLNR	R	L	0.95	46.1	20.3	0	2	0	0	2	1718.88	216	229
SK68	Tubulin alpha-1B chain	TBA1B_BOVIN,TBA1B_PIG	50133.7	1	11	16	40	0.0209	0.339	TIGGGDDSFNTFFSETGAGK	K	H	0.95	87	12.8	0	3	0	0	2	2007.89	41	60
SK68	Tubulin alpha-1B chain	TBA1B_BOVIN,TBA1B_PIG	50133.7	1	11	16	40	0.0209	0.339	VGINYQPPTVVPGGDLAK	K	V	0.95	52.9	18	0	2	0	0	2	1824.99	353	370
SK68	Sodium/potassium-transporting ATPase subunit beta-2	AT1B2_OCHCU,AT1B2_RABIT	33359	0.998	2	2	4	0.00209	0.0621	INAANIATDDER	R	D	0.95	72.5	17.6	0	2	0	0	2	1302.63	263	274	x
SK68	Sodium/potassium-transporting ATPase subunit beta-2	AT1B2_OCHCU,AT1B2_RABIT	33359	0.998	2	2	4	0.00209	0.0621	INAANIATDDERDKFAGR	R	V	0.95	29.8	18.9	0	0	2	0	2	1976.98	263	280	x
SK68	Phosphate carrier protein, mitochondrial	MPCP_BOVIN	40122.8	1	3	3	5	0.00261	0.0829	IQTQPGYANTLR	R	D	0.95	49.6	21.2	0	2	0	0	2	1361.72	190	201	x
SK68	Phosphate carrier protein, mitochondrial	MPCP_BOVIN	40122.8	1	3	3	5	0.00261	0.0829	SIFNGFSVTLK	K	E	0.95	41.6	18.6	0	2	0	0	2	1212.66	102	112	x
SK68	Phosphate carrier protein, mitochondrial	MPCP_BOVIN	40122.8	1	3	3	5	0.00261	0.0829	TVEALYK	R	F	0.95	24.7	17.9	1	0	0	0	2	823.456	241	247	x
SK68	Rod cGMP-specific 3',5'-cyclic phosphodiesterase subunit alpha	PDE6A_BOVIN	99325.4	1	16	22	44	0.023	0.173	ALADEYETK	K	M	0.95	35.5	17.6	2	2	0	0	2	1039.49	811	819	x
SK68	Rod cGMP-specific 3',5'-cyclic phosphodiesterase subunit alpha	PDE6A_BOVIN	99325.4	1	16	22	44	0.023	0.173	ALYTVR	K	A	0.95	23.1	16.1	0	1	0	0	2	722.419	262	267	x
SK68	Rod cGMP-specific 3',5'-cyclic phosphodiesterase subunit alpha	PDE6A_BOVIN	99325.4	1	16	22	44	0.023	0.173	DESLNIFQNLNR	R	R	0.95	29.1	19.7	0	2	0	0	2	1462.73	641	652	x
SK68	Rod cGMP-specific 3',5'-cyclic phosphodiesterase subunit alpha	PDE6A_BOVIN	99325.4	1	16	22	44	0.023	0.173	DFQDNLQAEK	R	C	0.95	43.7	17.3	0	2	0	0	2	1207.56	67	76	x
SK68	Rod cGMP-specific 3',5'-cyclic phosphodiesterase subunit alpha	PDE6A_BOVIN	99325.4	1	16	22	44	0.023	0.173	EINFYK	R	V	0.95	34.3	15.1	4	0	0	0	2	813.414	312	317	x
SK68	Rod cGMP-specific 3',5'-cyclic phosphodiesterase subunit alpha	PDE6A_BOVIN	99325.4	1	16	22	44	0.023	0.173	FHFSDLPLTELELVK	K	C	0.95	31.7	19.1	0	2	1	0	2	1787.96	506	520	x
SK68	Rod cGMP-specific 3',5'-cyclic phosphodiesterase subunit alpha	PDE6A_BOVIN	99325.4	1	16	22	44	0.023	0.173	FLDSNVSFAK	K	Q	0.95	32.3	17.3	2	2	0	0	2	1127.57	12	21	x
SK68	Rod cGMP-specific 3',5'-cyclic phosphodiesterase subunit alpha	PDE6A_BOVIN	99325.4	1	16	22	44	0.023	0.173	KEEIVGVATFYNR	K	K	0.95	35.2	19.3	0	2	2	0	2	1525.8	394	406	x
SK68	Rod cGMP-specific 3',5'-cyclic phosphodiesterase subunit alpha	PDE6A_BOVIN	99325.4	1	16	22	44	0.023	0.173	LHGSSILER	K	H	0.95	39.4	18.2	2	0	0	0	2	1011.56	621	629	x
SK68	Rod cGMP-specific 3',5'-cyclic phosphodiesterase subunit alpha	PDE6A_BOVIN	99325.4	1	16	22	44	0.023	0.173	NGIAELATR	R	L	0.95	33.8	18.6	0	2	0	0	2	944.516	103	111	x
SK68	Rod cGMP-specific 3',5'-cyclic phosphodiesterase subunit alpha	PDE6A_BOVIN	99325.4	1	16	22	44	0.023	0.173	TLLRDESLNIFQNLNR	K	R	0.95	32.6	18.6	0	0	2	0	2	1946.05	637	652	x
SK68	Rod cGMP-specific 3',5'-cyclic phosphodiesterase subunit alpha	PDE6A_BOVIN	99325.4	1	16	22	44	0.023	0.173	VFEELTDIER	K	Q	0.95	60.4	18.1	2	4	0	0	2	1250.63	248	257	x
SK68	Rod cGMP-specific 3',5'-cyclic phosphodiesterase subunit alpha	PDE6A_BOVIN	99325.4	1	16	22	44	0.023	0.173	VIDYILHGK	K	E	0.95	26.5	20	0	0	2	0	2	1057.6	318	326	x
SK68	Rod cGMP-specific 3',5'-cyclic phosphodiesterase subunit alpha	PDE6A_BOVIN	99325.4	1	16	22	44	0.023	0.173	VIDYILHGKEDIK	K	V	0.95	44	21.1	0	2	0	0	2	1542.85	318	330	x
SK68	Rod cGMP-specific 3',5'-cyclic phosphodiesterase subunit alpha	PDE6A_BOVIN	99325.4	1	16	22	44	0.023	0.173	VISDLLGPR	K	E	0.95	45.2	15.9	1	2	0	0	2	969.573	32	40	x
SK68	Rod cGMP-specific 3',5'-cyclic phosphodiesterase subunit alpha	PDE6A_BOVIN	99325.4	1	16	22	44	0.023	0.173	VVDKFHIPQEALVR	K	F	0.95	19.2	17.4	0	0	0	1	2	1650.93	531	544	x
SK68	ATP synthase subunit beta, mitochondrial	ATPB_BOVIN	56266.2	1	14	20	39	0.0204	0.352	AHGGYSVFAGVGER	K	T	0.95	62.1	17.6	0	2	2	0	2	1406.68	226	239	x
SK68	ATP synthase subunit beta, mitochondrial	ATPB_BOVIN	56266.2	1	14	20	39	0.0204	0.352	AIAELGIYPAVDPLDSTSR	R	I	0.95	62.1	21.8	0	2	2	0	2	1988.03	388	406	x
SK68	ATP synthase subunit beta, mitochondrial	ATPB_BOVIN	56266.2	1	14	20	39	0.0204	0.352	DQEGQDVLLFIDNIFR	R	F	0.95	94.5	18.5	0	2	0	0	2	1921.97	295	310	x
SK68	ATP synthase subunit beta, mitochondrial	ATPB_BOVIN	56266.2	1	14	20	39	0.0204	0.352	FLSQPFQVAEVFTGHLGK	R	L	0.95	33.2	19.5	0	1	0	0	2	2005.05	463	480	x
SK68	ATP synthase subunit beta, mitochondrial	ATPB_BOVIN	56266.2	1	14	20	39	0.0204	0.352	FTQAGSEVSALLGR	R	I	0.95	79.4	20.1	0	4	1	0	2	1435.75	311	324	x
SK68	ATP synthase subunit beta, mitochondrial	ATPB_BOVIN	56266.2	1	14	20	39	0.0204	0.352	IGLFGGAGVGK	K	T	0.95	29	18.7	0	1	0	0	2	975.562	202	212	x
SK68	ATP synthase subunit beta, mitochondrial	ATPB_BOVIN	56266.2	1	14	20	39	0.0204	0.352	IMNVIGEPIDER	R	G	0.95	31.3	19.9	0	2	0	0	2	1401.7	144	155	x
SK68	ATP synthase subunit beta, mitochondrial	ATPB_BOVIN	56266.2	1	14	20	39	0.0204	0.352	IPVGPETLGR	R	I	0.95	46.8	15.2	0	4	0	0	2	1038.59	134	143	x
SK68	ATP synthase subunit beta, mitochondrial	ATPB_BOVIN	56266.2	1	14	20	39	0.0204	0.352	LVLEVAQHLGESTVR	R	T	0.95	72.3	18.1	0	2	2	0	2	1650.92	95	109	x
SK68	ATP synthase subunit beta, mitochondrial	ATPB_BOVIN	56266.2	1	14	20	39	0.0204	0.352	TIAMDGTEGLVR	R	G	0.95	23.7	19.3	0	1	0	0	2	1278.64	110	121	x
SK68	ATP synthase subunit beta, mitochondrial	ATPB_BOVIN	56266.2	1	14	20	39	0.0204	0.352	TVLIMELINNVAK	K	A	0.95	40.6	18.3	0	2	0	0	2	1473.83	213	225	x
SK68	ATP synthase subunit beta, mitochondrial	ATPB_BOVIN	56266.2	1	14	20	39	0.0204	0.352	VALTGLTVAEYFR	R	D	0.95	85.5	18.8	0	3	2	0	2	1439.79	282	294	x
SK68	ATP synthase subunit beta, mitochondrial	ATPB_BOVIN	56266.2	1	14	20	39	0.0204	0.352	VLDSGAPIRIPVGPETLGR	K	I	0.95	38	14.9	0	0	1	0	2	1947.1	125	143	x
SK68	ATP synthase subunit beta, mitochondrial	ATPB_BOVIN	56266.2	1	14	20	39	0.0204	0.352	VVDLLAPYAK	K	G	0.95	33	17.5	2	1	0	0	2	1088.64	189	198	x
SK68	Ras-related protein Rab-14	RAB14_PIG	23909.6	0.998	2	2	3	0.00157	0.112	LTSEPQPQR	R	E	0.95	36.9	17.2	0	2	0	0	2	1055.55	202	210	x
SK68	Ras-related protein Rab-14	RAB14_PIG	23909.6	0.998	2	2	3	0.00157	0.112	TGENVEDAFLEAAKK	K	I	0.95	26.1	18.9	0	0	1	0	2	1621.81	157	171	x
SK68	Brain acid soluble protein 1	BASP1_BOVIN	22992.6	1	8	9	14	0.00731	0.639	AEGAGTEEEGTPK	K	E	0.95	32	11.1	0	1	0	0	2	1275.57	26	38	x
SK68	Brain acid soluble protein 1	BASP1_BOVIN	22992.6	1	8	9	14	0.00731	0.639	AQAPAAPADEVKPAETPAANSDQTVAVKE	K	-	0.95	36.8	17.2	0	0	2	0	2	2876.43	199	227	x
SK68	Brain acid soluble protein 1	BASP1_BOVIN	22992.6	1	8	9	14	0.00731	0.639	ASEAEAAEPAAPTKDDK	K	S	0.95	58.5	15.7	0	2	0	0	2	1700.8	125	141	x
SK68	Brain acid soluble protein 1	BASP1_BOVIN	22992.6	1	8	9	14	0.00731	0.639	EGEKDAEAAKEDAPK	K	A	0.95	30.3	17.2	0	0	1	0	2	1587.75	73	87	x
SK68	Brain acid soluble protein 1	BASP1_BOVIN	22992.6	1	8	9	14	0.00731	0.639	ENEAQAAAETPEVK	K	E	0.95	70	17.2	0	1	0	0	2	1486.7	39	52	x
SK68	Brain acid soluble protein 1	BASP1_BOVIN	22992.6	1	8	9	14	0.00731	0.639	ETPAATEAPSSTPK	K	A	0.95	48.4	17.4	0	2	0	0	2	1386.67	185	198	x
SK68	Brain acid soluble protein 1	BASP1_BOVIN	22992.6	1	8	9	14	0.00731	0.639	SDGAPASDSKPSSTEAAPSSK	K	E	0.95	53.6	16.8	0	2	1	0	2	1976.9	164	184	x
SK68	Brain acid soluble protein 1	BASP1_BOVIN	22992.6	1	8	9	14	0.00731	0.639	SKEGGDATKTEAPAAPAAQETK	K	S	0.95	51.6	20.2	0	0	2	0	2	2158.06	142	163	x
SK68	Monocarboxylate transporter 1	MOT1_BOVIN	54281.7	1	5	5	8	0.00418	0.108	ATEEDPKEAESPV	K	-	0.95	34.4	11.5	0	2	0	0	2	1401.64	489	501	x
SK68	Monocarboxylate transporter 1	MOT1_BOVIN	54281.7	1	5	5	8	0.00418	0.108	ESKDEETNVDVAEKPK	K	E	0.95	19.8	18.6	0	0	1	0	2	1817.88	461	476	x
SK68	Monocarboxylate transporter 1	MOT1_BOVIN	54281.7	1	5	5	8	0.00418	0.108	EVIDAAESPEHK	K	A	0.95	45.5	16.2	0	1	0	0	2	1324.64	477	488	x
SK68	Monocarboxylate transporter 1	MOT1_BOVIN	54281.7	1	5	5	8	0.00418	0.108	GSLQEAGKYETK	K	K	0.95	33.6	17.4	0	2	0	0	2	1310.66	212	223	x
SK68	Monocarboxylate transporter 1	MOT1_BOVIN	54281.7	1	5	5	8	0.00418	0.108	KESKDEETNVDVAEKPK	K	E	0.95	36.4	19.7	0	0	2	0	2	1945.97	460	476	x
SK68	Ras-related protein Rab-3A	RAB3A_BOVIN,RAB3A_PIG	24936.3	1	2	2	4	0.00209	0.136	ILIIGNSSVGK	K	T	0.95	27	14.9	0	2	0	0	2	1100.67	25	35	x
SK68	Ras-related protein Rab-3A	RAB3A_BOVIN,RAB3A_PIG	24936.3	1	2	2	4	0.00209	0.136	YADDSFTPAFVSTVGIDFK	R	V	0.95	63.3	18.5	0	2	0	0	2	2079.99	42	60	x
SK68	Calmodulin	CALM_BOVIN,CALM_RABIT,CALM_SHEEP	16820	1	3	4	8	0.00418	0.369	EADIDGDGQVNYEEFVQMMTAK	R	-	0.95	81.5	9.03	0	3	1	0	2	2490.08	128	149
SK68	Calmodulin	CALM_BOVIN,CALM_RABIT,CALM_SHEEP	16820	1	3	4	8	0.00418	0.369	EAFSLFDKDGDGTITTK	K	E	0.95	57.8	17.6	0	2	0	0	2	1844.89	15	31
SK68	Calmodulin	CALM_BOVIN,CALM_RABIT,CALM_SHEEP	16820	1	3	4	8	0.00418	0.369	VFDKDGNGYISAAELR	R	H	0.95	25.2	19.4	0	0	2	0	2	1754.87	92	107
SK68	Glutamine synthetase	GLNA_BOVIN,GLNA_PIG	42014.2	1	4	4	5	0.00261	0.0992	DIVEAHYR	R	A	0.95	23.4	17.3	0	1	0	0	2	1002.5	174	181
SK68	Glutamine synthetase	GLNA_BOVIN,GLNA_PIG	42014.2	1	4	4	5	0.00261	0.0992	LTGFHETSNINDFSAGVANR	R	G	0.95	29.1	17.6	0	0	2	0	2	2150.03	300	319
SK68	Glutamine synthetase	GLNA_BOVIN,GLNA_PIG	42014.2	1	4	4	5	0.00261	0.0992	RLTGFHETSNINDFSAGVANR	R	G	0.95	18.5	18.3	0	0	0	1	2	2306.13	299	319
SK68	Glutamine synthetase	GLNA_BOVIN,GLNA_PIG	42014.2	1	4	4	5	0.00261	0.0992	YIEEAIEK	K	L	0.95	22.5	18.3	1	0	0	0	2	994.509	269	276
SK68	Glyceraldehyde-3-phosphate dehydrogenase	G3P_BOVIN,G3P_CANFA,G3P_FELCA,G3P_PIG,G3P_RABIT	35850	0.999	2	2	4	0.00209	0.0691	GAAQNIIPASTGAAK	R	A	0.95	35.9	18.8	0	2	0	0	2	1369.74	199	213
SK68	Glyceraldehyde-3-phosphate dehydrogenase	G3P_BOVIN,G3P_CANFA,G3P_FELCA,G3P_PIG,G3P_RABIT	35850	0.999	2	2	4	0.00209	0.0691	VGVNGFGR	K	I	0.95	46.8	18.8	0	2	0	0	2	805.432	4	11
SK68	Cytochrome b-c1 complex subunit 2, mitochondrial	QCR2_BOVIN	48131.2	1	5	5	10	0.00522	0.166	AVALQNPQAHVIENLHAAAYR	K	N	0.95	35	17.9	0	0	2	0	2	2286.21	163	183	x
SK68	Cytochrome b-c1 complex subunit 2, mitochondrial	QCR2_BOVIN	48131.2	1	5	5	10	0.00522	0.166	GSNATSSLYQAVAK	R	G	0.95	64.1	18.3	0	2	0	0	2	1396.71	302	315	x
SK68	Cytochrome b-c1 complex subunit 2, mitochondrial	QCR2_BOVIN	48131.2	1	5	5	10	0.00522	0.166	IGLFIK	R	A	0.95	31	9.03	0	2	0	0	2	690.455	61	66	x
SK68	Cytochrome b-c1 complex subunit 2, mitochondrial	QCR2_BOVIN	48131.2	1	5	5	10	0.00522	0.166	LPNGLVIASLENYAPASR	R	I	0.95	54.5	18.6	0	2	0	0	2	1885.02	43	60	x
SK68	Cytochrome b-c1 complex subunit 2, mitochondrial	QCR2_BOVIN	48131.2	1	5	5	10	0.00522	0.166	TIAQGNLSNPDVQAAK	K	N	0.95	60.6	19.9	0	2	0	0	2	1626.84	360	375	x
SK68	ATP synthase subunit d, mitochondrial	ATP5H_BOVIN	18675.3	1	2	2	3	0.00157	0.106	AGLVDDFEKK	K	F	0.95	21.7	23.1	0	0	1	0	2	1121.58	64	73	x
SK68	ATP synthase subunit d, mitochondrial	ATP5H_BOVIN	18675.3	1	2	2	3	0.00157	0.106	VPIPEDK	K	Y	0.95	27.6	14.9	0	2	0	0	2	797.441	79	85	x
SK68	Regulator of G-protein signaling 9	RGS9_BOVIN	56663.9	1	4	4	6	0.00313	0.0909	GILEEYEKENYNFLNK	K	K	0.95	28.3	18.9	0	0	2	0	2	2002.98	134	149	x
SK68	Regulator of G-protein signaling 9	RGS9_BOVIN	56663.9	1	4	4	6	0.00313	0.0909	LFLAPGAR	K	R	0.95	24.4	19.5	0	2	0	0	2	844.504	353	360	x
SK68	Regulator of G-protein signaling 9	RGS9_BOVIN	56663.9	1	4	4	6	0.00313	0.0909	SSPSPVILR	R	Q	0.95	27.6	12.8	0	1	0	0	2	955.557	439	447	x
SK68	Regulator of G-protein signaling 9	RGS9_BOVIN	56663.9	1	4	4	6	0.00313	0.0909	YGYIYPLQDPR	K	N	0.95	23.9	19.3	0	1	0	0	2	1384.69	80	90	x
SK68	NADH dehydrogenase [ubiquinone] 1 alpha subcomplex subunit 9, mitochondrial	NDUA9_BOVIN	42830.8	1	2	2	2	0.00104	0.0789	FLNYFANIR	R	W	0.95	27.9	20.3	0	1	0	0	2	1157.61	213	221
SK68	NADH dehydrogenase [ubiquinone] 1 alpha subcomplex subunit 9, mitochondrial	NDUA9_BOVIN	42830.8	1	2	2	2	0.00104	0.0789	ILPHLPGLEDLGVEATPLELK	K	A	0.95	40	14	0	0	1	0	2	2254.27	328	348
SK68	Voltage-dependent anion-selective channel protein 2	VDAC2_BOVIN,VDAC2_PIG,VDAC2_RABIT	31602.5	1	6	8	13	0.00678	0.296	GFGFGLVK	K	L	0.95	23.8	17.5	0	1	0	0	2	824.467	32	39	x
SK68	Voltage-dependent anion-selective channel protein 2	VDAC2_BOVIN,VDAC2_PIG,VDAC2_RABIT	31602.5	1	6	8	13	0.00678	0.296	LTFDTTFSPNTGKK	K	S	0.95	27.7	19.4	0	2	0	0	2	1556.8	108	121	x
SK68	Voltage-dependent anion-selective channel protein 2	VDAC2_BOVIN,VDAC2_PIG,VDAC2_RABIT	31602.5	1	6	8	13	0.00678	0.296	LTLSALVDGK	K	S	0.95	62.1	17.1	1	2	0	0	2	1016.6	268	277	x
SK68	Voltage-dependent anion-selective channel protein 2	VDAC2_BOVIN,VDAC2_PIG,VDAC2_RABIT	31602.5	1	6	8	13	0.00678	0.296	TGDFQLHTNVNDGTEFGGSIYQK	R	V	0.95	22.6	15.2	0	0	2	0	2	2528.17	186	208	x
SK68	Voltage-dependent anion-selective channel protein 2	VDAC2_BOVIN,VDAC2_PIG,VDAC2_RABIT	31602.5	1	6	8	13	0.00678	0.296	VNNSSLIGVGYTQTLRPGVK	K	L	0.95	64	16.5	0	2	1	0	2	2103.16	248	267	x
SK68	Voltage-dependent anion-selective channel protein 2	VDAC2_BOVIN,VDAC2_PIG,VDAC2_RABIT	31602.5	1	6	8	13	0.00678	0.296	YQLDPTASISAK	K	V	0.95	43.1	19.5	0	2	0	0	2	1293.67	236	247	x
SK68	Solute carrier family 2, facilitated glucose transporter member 1	GTR1_BOVIN,GTR1_PIG,GTR1_RABIT,GTR1_SHEEP	54115.2	1	3	4	7	0.00365	0.0386	KVTILELFR	K	S	0.95	46.5	13.2	0	2	1	0	2	1118.69	256	264	x
SK68	Solute carrier family 2, facilitated glucose transporter member 1	GTR1_BOVIN,GTR1_PIG,GTR1_RABIT,GTR1_SHEEP	54115.2	1	3	4	7	0.00365	0.0386	TFDEIASGFR	R	Q	0.95	47.6	15.7	0	2	0	0	2	1142.55	459	468	x
SK68	Solute carrier family 2, facilitated glucose transporter member 1	GTR1_BOVIN,GTR1_PIG,GTR1_RABIT,GTR1_SHEEP	54115.2	1	3	4	7	0.00365	0.0386	VTILELFR	K	S	0.95	53.4	17.1	0	2	0	0	2	990.598	257	264	x
SK68	Regulator of G-protein signaling 9-binding protein	R9BP_BOVIN	25690.5	1	3	4	8	0.00418	0.148	ALALSTEFPLQEPR	R	R	0.95	43.3	19.4	0	3	0	0	2	1571.84	96	109	x
SK68	Regulator of G-protein signaling 9-binding protein	R9BP_BOVIN	25690.5	1	3	4	8	0.00418	0.148	AQELAVAIR	K	L	0.95	23.3	16.5	0	1	0	0	2	970.568	47	55	x
SK68	Regulator of G-protein signaling 9-binding protein	R9BP_BOVIN	25690.5	1	3	4	8	0.00418	0.148	DFDVEDLHQLER	R	E	0.95	54.2	18.6	0	2	2	0	2	1515.71	141	152	x
SK68	S-arrestin	ARRS_BOVIN	45257.2	1	15	19	31	0.0162	0.512	AFATHSTDVEEDKIPK	K	K	0.95	45	17	0	2	2	0	2	1787.88	151	166
SK68	S-arrestin	ARRS_BOVIN	45257.2	1	15	19	31	0.0162	0.512	ANKPAPNHVIFK	K	K	0.95	17.8	18.3	0	0	1	0	2	1335.75	3	14
SK68	S-arrestin	ARRS_BOVIN	45257.2	1	15	19	31	0.0162	0.512	DKSVTIYLGK	R	R	0.95	26.4	20.3	0	1	0	0	2	1123.64	19	28
SK68	S-arrestin	ARRS_BOVIN	45257.2	1	15	19	31	0.0162	0.512	DKSVTIYLGKR	R	D	0.95	27.6	18	0	0	2	0	2	1279.74	19	29
SK68	S-arrestin	ARRS_BOVIN	45257.2	1	15	19	31	0.0162	0.512	DLYFSQVQVFPPVGASGATTR	R	L	0.95	65.8	21.4	0	1	0	0	2	2240.13	82	102
SK68	S-arrestin	ARRS_BOVIN	45257.2	1	15	19	31	0.0162	0.512	EIYYHGEPIPVTVAVTNSTEK	K	T	0.95	72.5	19.2	0	1	1	0	2	2347.18	212	232
SK68	S-arrestin	ARRS_BOVIN	45257.2	1	15	19	31	0.0162	0.512	ESFQDENFVFEEFAR	K	Q	0.95	49.9	12	0	1	0	0	2	1893.83	368	382
SK68	S-arrestin	ARRS_BOVIN	45257.2	1	15	19	31	0.0162	0.512	HEDTNLASSTIIK	K	E	0.95	24.3	18.2	0	1	0	0	2	1428.73	301	313
SK68	S-arrestin	ARRS_BOVIN	45257.2	1	15	19	31	0.0162	0.512	IKHEDTNLASSTIIK	K	E	0.95	23.8	19	0	0	1	0	2	1669.91	299	313
SK68	S-arrestin	ARRS_BOVIN	45257.2	1	15	19	31	0.0162	0.512	LTVSGLLGELTSSEVATEVPFR	K	L	0.95	49.7	17.6	0	1	0	0	2	2305.23	333	354
SK68	S-arrestin	ARRS_BOVIN	45257.2	1	15	19	31	0.0162	0.512	RDYIDHVER	K	V	0.95	29.6	15.9	0	0	2	0	2	1202.59	29	37
SK68	S-arrestin	ARRS_BOVIN	45257.2	1	15	19	31	0.0162	0.512	TLTLVPLLANNR	K	E	0.95	59.8	11.1	0	3	0	0	2	1324.79	277	288
SK68	S-arrestin	ARRS_BOVIN	45257.2	1	15	19	31	0.0162	0.512	TVAAEEAQEKVPPNSSLTK	K	T	0.95	30	19.1	0	0	2	0	2	1999.03	258	276
SK68	S-arrestin	ARRS_BOVIN	45257.2	1	15	19	31	0.0162	0.512	VEPVDGVVLVDPELVK	R	G	0.95	65.8	17.3	0	4	2	0	2	1706.96	38	53
SK68	S-arrestin	ARRS_BOVIN	45257.2	1	15	19	31	0.0162	0.512	VLVEQVTNVVLYSSDYYIK	K	T	0.95	60.5	19.4	0	1	2	0	2	2232.18	239	257
SK68	Tubulin alpha-4A chain	TBA4A_BOVIN	49906.6	1	2	2	5	0.00261	0.257	AVFVDLEPTVIDEIR	R	N	0.95	67.2	18.8	0	3	0	0	2	1715.92	65	79
SK68	Tubulin alpha-4A chain	TBA4A_BOVIN	49906.6	1	2	2	5	0.00261	0.257	DVNAAIAAIK	K	T	0.95	44.1	17.2	0	2	0	0	2	985.568	327	336
SK68	Tubulin alpha-4A chain	TBA4A_BOVIN	49906.6	1	2	2	5	0.00261	0.257	FDGALNVDLTEFQTNLVPYPR	R	I	0.95	83	20	0	4	2	0	2	2409.21	244	264
SK68	Tubulin alpha-4A chain	TBA4A_BOVIN	49906.6	1	2	2	5	0.00261	0.257	IHFPLATYAPVISAEK	R	A	0.95	62.5	17.6	0	3	2	0	2	1756.96	265	280
SK68	Tubulin alpha-4A chain	TBA4A_BOVIN	49906.6	1	2	2	5	0.00261	0.257	LISQIVSSITASLR	R	F	0.95	74.1	16.3	0	4	1	0	2	1487.88	230	243
SK68	Tubulin alpha-4A chain	TBA4A_BOVIN	49906.6	1	2	2	5	0.00261	0.257	LSVDYGK	R	K	0.95	32.6	17.7	2	0	0	0	2	781.409	157	163
SK68	Tubulin alpha-4A chain	TBA4A_BOVIN	49906.6	1	2	2	5	0.00261	0.257	NLDIERPTYTNLNR	R	L	0.95	46.1	20.3	0	2	0	0	2	1718.88	216	229
SK68	Tubulin alpha-4A chain	TBA4A_BOVIN	49906.6	1	2	2	5	0.00261	0.257	VGINYQPPTVVPGGDLAK	K	V	0.95	52.9	18	0	2	0	0	2	1824.99	353	370
SK68	Alpha-enolase	ENOA_BOVIN	47309.1	1	3	4	5	0.00261	0.108	AAVPSGASTGIYEALELR	R	D	0.95	76.1	19.8	0	2	1	0	2	1804.94	33	50	x
SK68	Alpha-enolase	ENOA_BOVIN	47309.1	1	3	4	5	0.00261	0.108	DATNVGDEGGFAPNILENK	K	E	0.95	45.3	18.9	0	1	0	0	2	1960.92	203	221	x
SK68	Alpha-enolase	ENOA_BOVIN	47309.1	1	3	4	5	0.00261	0.108	IGAEVYHNLK	R	N	0.95	27.5	20	0	0	1	0	2	1143.62	184	193	x
SK68	60 kDa heat shock protein, mitochondrial	CH60_BOVIN	61090.8	1	2	2	4	0.00209	0.0366	VGGTSDVEVNEK	K	K	0.95	38.2	18.1	0	2	0	0	2	1233.6	406	417
SK68	60 kDa heat shock protein, mitochondrial	CH60_BOVIN	61090.8	1	2	2	4	0.00209	0.0366	VTDALNATR	R	A	0.95	41.2	19.1	0	2	0	0	2	960.511	421	429
SK68	Heat shock protein beta-1	HSPB1_BOVIN	22375.1	1	4	4	8	0.00418	0.209	ALPAAAIEGPAYNR	R	A	0.95	41.6	21.6	0	2	0	0	2	1413.75	58	71
SK68	Heat shock protein beta-1	HSPB1_BOVIN	22375.1	1	4	4	8	0.00418	0.209	LFDQAFGLPR	R	L	0.95	33.1	18.7	0	2	0	0	2	1163.62	29	38
SK68	Heat shock protein beta-1	HSPB1_BOVIN	22375.1	1	4	4	8	0.00418	0.209	TKDGVVEITGK	K	H	0.95	21.8	19.1	0	0	2	0	2	1146.64	109	119
SK68	Heat shock protein beta-1	HSPB1_BOVIN	22375.1	1	4	4	8	0.00418	0.209	VPFSLLR	R	G	0.95	31.1	17.2	0	2	0	0	2	831.509	6	12
SK68	Retinaldehyde-binding protein 1	RLBP1_BOVIN	36487.8	1	3	3	5	0.00261	0.104	AVAEQLFGPR	K	D	0.95	47.1	19.7	0	2	0	0	2	1087.59	300	309
SK68	Retinaldehyde-binding protein 1	RLBP1_BOVIN	36487.8	1	3	3	5	0.00261	0.104	DSAFFLR	K	F	0.95	32.3	16.5	0	1	0	0	2	855.436	92	98
SK68	Retinaldehyde-binding protein 1	RLBP1_BOVIN	36487.8	1	3	3	5	0.00261	0.104	LQYPELFDSLSPEAVR	R	C	0.95	27.9	20.2	0	2	0	0	2	1863.95	122	137
SK68	Myristoylated alanine-rich C-kinase substrate	MARCS_BOVIN	31646.2	0.998	2	2	3	0.00157	0.105	AEDGATPSPSNETPKK	K	K	0.95	35.9	17.4	0	0	2	0	2	1628.78	137	152	x
SK68	Myristoylated alanine-rich C-kinase substrate	MARCS_BOVIN	31646.2	0.998	2	2	3	0.00157	0.105	GEATAERPGEAAVASSPSK	K	A	0.95	36.5	17.7	0	0	1	0	2	1814.89	12	30	x
SK68	Tubulin beta-5 chain	TBB5_BOVIN,TBB5_PIG	49652.6	0.998	2	2	2	0.00104	0.223	ALTVPELTQQVFDAK	R	N	0.95	36.8	19.9	0	1	0	0	2	1659.9	283	297
SK68	Tubulin beta-5 chain	TBB5_BOVIN,TBB5_PIG	49652.6	0.998	2	2	2	0.00104	0.223	EVDEQMLNVQNK	K	N	0.95	75.8	17.6	0	2	0	0	2	1462.68	325	336
SK68	Tubulin beta-5 chain	TBB5_BOVIN,TBB5_PIG	49652.6	0.998	2	2	2	0.00104	0.223	FPGQLNADLR	R	K	0.95	51.2	19.1	0	2	0	0	2	1130.6	242	251
SK68	Tubulin beta-5 chain	TBB5_BOVIN,TBB5_PIG	49652.6	0.998	2	2	2	0.00104	0.223	GHYTEGAELVDSVLDVVR	K	K	0.95	94	19.9	0	2	2	0	2	1958.98	104	121
SK68	Tubulin beta-5 chain	TBB5_BOVIN,TBB5_PIG	49652.6	0.998	2	2	2	0.00104	0.223	GHYTEGAELVDSVLDVVRK	K	E	0.95	33.6	19.1	0	0	1	0	2	2087.08	104	122
SK68	Tubulin beta-5 chain	TBB5_BOVIN,TBB5_PIG	49652.6	0.998	2	2	2	0.00104	0.223	IMNTFSVVPSPK	R	V	0.95	37.6	19.7	0	2	0	0	2	1335.7	163	174
SK68	Tubulin beta-5 chain	TBB5_BOVIN,TBB5_PIG	49652.6	0.998	2	2	2	0.00104	0.223	ISEQFTAMFR	R	R	0.95	30.5	16.8	0	1	0	0	2	1245.59	381	390
SK68	Tubulin beta-5 chain	TBB5_BOVIN,TBB5_PIG	49652.6	0.998	2	2	2	0.00104	0.223	ISVYYNEATGGK	R	Y	0.95	66.2	16.7	0	1	0	0	2	1301.64	47	58
SK68	Tubulin beta-5 chain	TBB5_BOVIN,TBB5_PIG	49652.6	0.998	2	2	2	0.00104	0.223	YLTVAAVFR	R	G	0.95	60.7	15.8	0	2	0	0	2	1039.59	310	318
SK68	NADH dehydrogenase [ubiquinone] 1 alpha subcomplex subunit 5	NDUA5_BOVIN	13298	0.998	2	2	3	0.00157	0.267	ILDVLGHIPK	K	N	0.95	21.8	11.5	0	0	2	0	2	1104.68	31	40	x
SK68	NADH dehydrogenase [ubiquinone] 1 alpha subcomplex subunit 5	NDUA5_BOVIN	13298	0.998	2	2	3	0.00157	0.267	LQGGQIEEVILQAENELSLAR	R	K	0.95	28.3	17.9	0	0	1	0	2	2310.23	72	92	x
SK68	Mitochondrial 2-oxoglutarate/malate carrier protein	M2OM_BOVIN	34155	1	3	3	5	0.00261	0.108	AVVVNAAQLASYSQSK	R	Q	0.95	73	19.4	0	2	0	0	2	1635.87	191	206	x
SK68	Mitochondrial 2-oxoglutarate/malate carrier protein	M2OM_BOVIN	34155	1	3	3	5	0.00261	0.108	LGIYTVLFER	R	L	0.95	23.1	16.7	0	1	0	0	2	1210.68	99	108	x
SK68	Mitochondrial 2-oxoglutarate/malate carrier protein	M2OM_BOVIN	34155	1	3	3	5	0.00261	0.108	NVFNALFR	K	I	0.95	26.6	16.3	0	2	0	0	2	980.531	163	170	x
SK68	Rod cGMP-specific 3',5'-cyclic phosphodiesterase subunit beta	PDE6B_BOVIN	98314.7	1	7	8	15	0.00783	0.141	ALADEYEAK	K	V	0.95	25	17.1	0	1	0	0	2	1009.48	809	817	x
SK68	Rod cGMP-specific 3',5'-cyclic phosphodiesterase subunit beta	PDE6B_BOVIN	98314.7	1	7	8	15	0.00783	0.141	EILFYK	R	V	0.95	37.6	13	2	0	0	0	2	812.455	310	315	x
SK68	Rod cGMP-specific 3',5'-cyclic phosphodiesterase subunit beta	PDE6B_BOVIN	98314.7	1	7	8	15	0.00783	0.141	EVLPGPAK	K	F	0.95	30.8	13	2	0	0	0	2	810.472	491	498	x
SK68	Rod cGMP-specific 3',5'-cyclic phosphodiesterase subunit beta	PDE6B_BOVIN	98314.7	1	7	8	15	0.00783	0.141	FLDQNPGFADQYFGR	R	K	0.95	66.2	16	0	4	2	0	2	1774.82	11	25	x
SK68	Rod cGMP-specific 3',5'-cyclic phosphodiesterase subunit beta	PDE6B_BOVIN	98314.7	1	7	8	15	0.00783	0.141	FLLSEETLNIYQNLNR	K	R	0.95	50	18.3	0	1	0	0	2	1967.02	635	650	x
SK68	Rod cGMP-specific 3',5'-cyclic phosphodiesterase subunit beta	PDE6B_BOVIN	98314.7	1	7	8	15	0.00783	0.141	IVDESKNYEDRK	K	S	0.95	21.2	19.3	0	0	0	1	2	1495.74	682	693	x
SK68	Rod cGMP-specific 3',5'-cyclic phosphodiesterase subunit beta	PDE6B_BOVIN	98314.7	1	7	8	15	0.00783	0.141	KEEIVGVATFYNR	K	K	0.95	35.2	19.3	0	2	2	0	2	1525.8	392	404	x
SK68	Rod cGMP-specific 3',5'-cyclic phosphodiesterase subunit beta	PDE6B_BOVIN	98314.7	1	7	8	15	0.00783	0.141	LHGSSILER	K	H	0.95	39.4	18.2	2	0	0	0	2	1011.56	619	627	x
SK68	Rod cGMP-specific 3',5'-cyclic phosphodiesterase subunit beta	PDE6B_BOVIN	98314.7	1	7	8	15	0.00783	0.141	NGVAELATR	R	L	0.95	25.9	19.4	0	2	0	0	2	930.5	101	109	x
SK68	Rod cGMP-specific 3',5'-cyclic phosphodiesterase subunit beta	PDE6B_BOVIN	98314.7	1	7	8	15	0.00783	0.141	VFEELTDIER	K	Q	0.95	60.4	18.1	2	4	0	0	2	1250.63	246	255	x
SK68	Rod cGMP-specific 3',5'-cyclic phosphodiesterase subunit beta	PDE6B_BOVIN	98314.7	1	7	8	15	0.00783	0.141	VIDYILHGK	K	E	0.95	26.5	20	0	0	2	0	2	1057.6	316	324	x
SK68	Rod cGMP-specific 3',5'-cyclic phosphodiesterase subunit beta	PDE6B_BOVIN	98314.7	1	7	8	15	0.00783	0.141	VIDYILHGKEDIK	K	V	0.95	44	21.1	0	2	0	0	2	1542.85	316	328	x
SK68	Ras-related protein Rap-1A	RAP1A_BOVIN,RAP1B_BOVIN	20969.3	1	3	3	6	0.00313	0.136	INVNEIFYDLVR	K	Q	0.95	40.6	21.1	0	2	0	0	2	1494.8	152	163	x
SK68	Ras-related protein Rap-1A	RAP1A_BOVIN,RAP1B_BOVIN	20969.3	1	3	3	6	0.00313	0.136	LVVLGSGGVGK	K	S	0.95	36.9	16.3	0	2	0	0	2	985.604	6	16	x
SK68	Ras-related protein Rap-1A	RAP1A_BOVIN,RAP1B_BOVIN	20969.3	1	3	3	6	0.00313	0.136	SKINVNEIFYDLVR	K	Q	0.95	28.2	19.4	0	0	2	0	2	1709.92	150	163	x
SK68	Ubiquitin	UBIQ_BOVIN	8547.2	0.999	2	2	4	0.00209	0.329	ESTLHLVLR	K	L	0.95	38.2	16.3	0	2	0	0	2	1067.62	64	72
SK68	Ubiquitin	UBIQ_BOVIN	8547.2	0.999	2	2	4	0.00209	0.329	TITLEVEPSDTIENVK	K	A	0.95	45.2	19.4	0	2	0	0	2	1787.93	12	27
SK68	Rhodopsin kinase	RK_BOVIN	62918.2	1	7	7	11	0.00574	0.162	AGAGDGLFQPLLR	R	A	0.946	22.4	19.8	0	1	0	0	2	1314.72	136	148	x
SK68	Rhodopsin kinase	RK_BOVIN	62918.2	1	7	7	11	0.00574	0.162	DIEDYDTADDALRPQK	K	A	0.95	62.2	13.8	0	1	0	0	2	1864.86	91	106	x
SK68	Rhodopsin kinase	RK_BOVIN	62918.2	1	7	7	11	0.00574	0.162	DLKPENVLLDDDGNVR	R	I	0.95	30.8	19.4	0	1	0	0	2	1811.91	314	329	x
SK68	Rhodopsin kinase	RK_BOVIN	62918.2	1	7	7	11	0.00574	0.162	ISDLGLAVELK	R	A	0.95	49.2	19	0	2	0	0	2	1157.68	330	340	x
SK68	Rhodopsin kinase	RK_BOVIN	62918.2	1	7	7	11	0.00574	0.162	LFQQFLR	R	T	0.95	37.3	16.7	0	2	0	0	2	951.541	71	77	x
SK68	Rhodopsin kinase	RK_BOVIN	62918.2	1	7	7	11	0.00574	0.162	VLEQAVTYPDK	R	F	0.95	54.6	19.2	0	2	0	0	2	1262.66	405	415	x
SK68	Rhodopsin kinase	RK_BOVIN	62918.2	1	7	7	11	0.00574	0.162	YHIYNVDEDNPGFQEPR	R	A	0.95	44.9	13.8	0	0	2	0	2	2092.94	274	290	x
SK68	Cyclic nucleotide-gated cation channel beta-1	CNGB1_BOVIN	155047	1	10	10	17	0.00887	0.0968	ATSTASQNSAIINDR	R	L	0.95	51.6	18.7	0	2	0	0	2	1548.76	667	681	x
SK68	Cyclic nucleotide-gated cation channel beta-1	CNGB1_BOVIN	155047	1	10	10	17	0.00887	0.0968	DVVGAATAGQTYYR	R	S	0.95	49.8	18.8	0	2	0	0	2	1471.72	995	1008	x
SK68	Cyclic nucleotide-gated cation channel beta-1	CNGB1_BOVIN	155047	1	10	10	17	0.00887	0.0968	EKEEEEGEEKEEEEGR	R	E	0.95	35.2	10	0	0	2	0	2	1964.82	376	391	x
SK68	Cyclic nucleotide-gated cation channel beta-1	CNGB1_BOVIN	155047	1	10	10	17	0.00887	0.0968	ELAALEAAAR	K	Q	0.95	23.4	17.1	0	1	0	0	2	1014.56	1251	1260	x
SK68	Cyclic nucleotide-gated cation channel beta-1	CNGB1_BOVIN	155047	1	10	10	17	0.00887	0.0968	GKEEEEGGEKEEEEGR	R	G	0.95	18.6	8.45	0	0	0	2	2	1820.78	431	446	x
SK68	Cyclic nucleotide-gated cation channel beta-1	CNGB1_BOVIN	155047	1	10	10	17	0.00887	0.0968	IHVTLGPDPSEQILLVEVPEKQEEK	R	E	0.95	21	16.2	0	0	0	1	2	2827.51	1347	1371	x
SK68	Cyclic nucleotide-gated cation channel beta-1	CNGB1_BOVIN	155047	1	10	10	17	0.00887	0.0968	LFNAALAAAGK	K	M	0.95	47.4	20.1	0	2	0	0	2	1046.6	1221	1231	x
SK68	Cyclic nucleotide-gated cation channel beta-1	CNGB1_BOVIN	155047	1	10	10	17	0.00887	0.0968	LKELAALEAAAR	R	Q	0.95	35.8	15.9	0	2	0	0	2	1255.74	1249	1260	x
SK68	Cyclic nucleotide-gated cation channel beta-1	CNGB1_BOVIN	155047	1	10	10	17	0.00887	0.0968	SDTLAVPGSATGSLR	K	K	0.95	30.8	18.9	0	2	0	0	2	1431.74	612	626	x
SK68	Cyclic nucleotide-gated cation channel beta-1	CNGB1_BOVIN	155047	1	10	10	17	0.00887	0.0968	VLPQPPGTPQK	R	T	0.95	28	17.3	0	1	0	0	2	1161.66	8	18	x
SK68	Hemoglobin subunit beta	HBB_BOVIN	15936.2	1	3	4	8	0.00418	0.255	LLGNVLVVVLAR	K	N	0.95	51.2	15.8	0	2	0	0	2	1265.83	104	115
SK68	Hemoglobin subunit beta	HBB_BOVIN	15936.2	1	3	4	8	0.00418	0.255	VKVDEVGGEALGR	K	L	0.95	32.2	19.4	0	0	2	0	2	1328.72	17	29
SK68	Hemoglobin subunit beta	HBB_BOVIN	15936.2	1	3	4	8	0.00418	0.255	VVAGVANALAHR	K	Y	0.95	43.2	18.9	0	2	2	0	2	1177.68	132	143
SK68	L-lactate dehydrogenase B chain	LDHB_BOVIN	36705.8	0.999	2	2	4	0.00209	0.0599	IVVVTAGVR	K	Q	0.95	34.2	15.1	0	2	0	0	2	913.583	92	100
SK68	L-lactate dehydrogenase B chain	LDHB_BOVIN	36705.8	0.999	2	2	4	0.00209	0.0599	LKDEEVAQLKK	K	S	0.95	34.7	17.1	0	0	2	0	2	1300.75	309	319
SK68	ATP synthase subunit gamma, mitochondrial	ATPG_BOVIN	33055.7	1	5	5	7	0.00365	0.211	ELIEIISGAAALD	K	-	0.95	48.8	19.3	0	1	0	0	2	1314.72	286	298	x
SK68	ATP synthase subunit gamma, mitochondrial	ATPG_BOVIN	33055.7	1	5	5	7	0.00365	0.211	NYQEYSLANIIYYSLK	R	E	0.95	61.6	19.1	0	2	0	0	2	1981.99	228	243	x
SK68	ATP synthase subunit gamma, mitochondrial	ATPG_BOVIN	33055.7	1	5	5	7	0.00365	0.211	SEAANLAAAGK	K	E	0.95	28.4	19.7	0	1	0	0	2	1002.52	116	126	x
SK68	ATP synthase subunit gamma, mitochondrial	ATPG_BOVIN	33055.7	1	5	5	7	0.00365	0.211	THSDQFLVTFK	R	E	0.95	18.9	19	0	0	1	0	2	1322.67	144	154	x
SK68	ATP synthase subunit gamma, mitochondrial	ATPG_BOVIN	33055.7	1	5	5	7	0.00365	0.211	VYGVGSLALYEK	R	A	0.95	60.7	19.3	0	2	0	0	2	1298.7	68	79	x
SK68	ATP synthase subunit b, mitochondrial	AT5F1_BOVIN	28804	1	2	2	3	0.00157	0.0742	IAQLEEVK	K	Q	0.95	31.7	19.3	0	1	0	0	2	929.53	132	139
SK68	ATP synthase subunit b, mitochondrial	AT5F1_BOVIN	28804	1	2	2	3	0.00157	0.0742	VVQSISAQQEK	R	E	0.95	51.2	21.1	0	2	0	0	2	1216.65	223	233
SK68	Mitochondrial glutamate carrier 1	GHC1_BOVIN	34514.5	1	2	2	3	0.00157	0.0652	GAAVNLTLVTPEK	R	A	0.95	37.3	19.6	0	2	0	0	2	1312.75	68	80	x
SK68	Mitochondrial glutamate carrier 1	GHC1_BOVIN	34514.5	1	2	2	3	0.00157	0.0652	LAANDFFR	K	Y	0.95	49	18.6	0	1	0	0	2	953.484	84	91	x
SK68	ATP synthase subunit alpha, mitochondrial	ATPA_BOVIN	59703.3	1	18	19	38	0.0198	0.396	APGIIPR	K	I	0.95	39.3	10.4	0	4	0	0	2	723.451	176	182	x
SK68	ATP synthase subunit alpha, mitochondrial	ATPA_BOVIN	59703.3	1	18	19	38	0.0198	0.396	AVDSLVPIGR	K	G	0.95	30.4	14.8	1	0	0	0	2	1026.59	195	204	x
SK68	ATP synthase subunit alpha, mitochondrial	ATPA_BOVIN	59703.3	1	18	19	38	0.0198	0.396	EAYPGDVFYLHSR	R	L	0.95	22.2	16.2	0	0	2	0	2	1553.74	335	347	x
SK68	ATP synthase subunit alpha, mitochondrial	ATPA_BOVIN	59703.3	1	18	19	38	0.0198	0.396	EIVTNFLAGFEA	K	-	0.95	47.2	17.1	0	2	0	0	2	1310.66	542	553	x
SK68	ATP synthase subunit alpha, mitochondrial	ATPA_BOVIN	59703.3	1	18	19	38	0.0198	0.396	EVAAFAQFGSDLDAATQQLLSR	R	G	0.95	94.6	19.4	0	3	1	0	2	2338.17	442	463	x
SK68	ATP synthase subunit alpha, mitochondrial	ATPA_BOVIN	59703.3	1	18	19	38	0.0198	0.396	FENAFLSHVISQHQALLSK	K	I	0.95	25.6	18.5	0	0	0	2	2	2169.15	507	525	x
SK68	ATP synthase subunit alpha, mitochondrial	ATPA_BOVIN	59703.3	1	18	19	38	0.0198	0.396	GIRPAINVGLSVSR	K	V	0.95	35	14.1	0	2	0	0	2	1438.85	403	416	x
SK68	ATP synthase subunit alpha, mitochondrial	ATPA_BOVIN	59703.3	1	18	19	38	0.0198	0.396	GYLDKLEPSK	R	I	0.95	26	19.5	0	2	0	0	2	1149.62	494	503	x
SK68	ATP synthase subunit alpha, mitochondrial	ATPA_BOVIN	59703.3	1	18	19	38	0.0198	0.396	HALIIYDDLSK	K	Q	0.95	52.4	19.7	0	3	0	0	2	1287.69	306	316	x
SK68	ATP synthase subunit alpha, mitochondrial	ATPA_BOVIN	59703.3	1	18	19	38	0.0198	0.396	ILGADTSVDLEETGR	R	V	0.95	89.7	18.9	0	2	0	0	2	1575.79	59	73	x
SK68	ATP synthase subunit alpha, mitochondrial	ATPA_BOVIN	59703.3	1	18	19	38	0.0198	0.396	LELAQYR	K	E	0.95	25.2	20.3	0	1	0	0	2	892.489	435	441	x
SK68	ATP synthase subunit alpha, mitochondrial	ATPA_BOVIN	59703.3	1	18	19	38	0.0198	0.396	LKEIVTNFLAGFEA	K	-	0.95	67.6	19.2	0	3	0	0	2	1551.84	540	553	x
SK68	ATP synthase subunit alpha, mitochondrial	ATPA_BOVIN	59703.3	1	18	19	38	0.0198	0.396	STVAQLVK	R	R	0.95	33.3	19.9	0	2	0	0	2	845.509	254	261	x
SK68	ATP synthase subunit alpha, mitochondrial	ATPA_BOVIN	59703.3	1	18	19	38	0.0198	0.396	TGAIVDVPVGEELLGR	R	V	0.95	63.2	17.5	0	2	0	0	2	1624.89	134	149	x
SK68	ATP synthase subunit alpha, mitochondrial	ATPA_BOVIN	59703.3	1	18	19	38	0.0198	0.396	TGTAEVSSILEER	K	I	0.95	50	18.7	0	2	0	0	2	1391.7	46	58	x
SK68	ATP synthase subunit alpha, mitochondrial	ATPA_BOVIN	59703.3	1	18	19	38	0.0198	0.396	TSIAIDTIINQK	K	R	0.95	43.5	17.7	0	1	0	0	2	1316.74	219	230	x
SK68	ATP synthase subunit alpha, mitochondrial	ATPA_BOVIN	59703.3	1	18	19	38	0.0198	0.396	VLSIGDGIAR	R	V	0.95	31.9	18.9	0	1	0	0	2	1000.58	74	83	x
SK68	ATP synthase subunit alpha, mitochondrial	ATPA_BOVIN	59703.3	1	18	19	38	0.0198	0.396	VVDALGNAIDGKGPIGSK	R	A	0.95	31.6	17.7	0	0	2	0	2	1710.94	150	167	x
SK68	Guanine nucleotide-binding protein subunit beta-5	GBB5_RABIT	38737.5	1	3	4	7	0.00365	0.068	AKLHDVELHQVAER	R	V	0.95	22.9	19.5	0	0	0	2	2	1644.88	31	44	x
SK68	Guanine nucleotide-binding protein subunit beta-5	GBB5_RABIT	38737.5	1	3	4	7	0.00365	0.068	LHDVELHQVAER	K	V	0.95	41.5	19.7	0	1	0	0	2	1445.75	33	44	x
SK68	Guanine nucleotide-binding protein subunit beta-5	GBB5_RABIT	38737.5	1	3	4	7	0.00365	0.068	VSILFGHENR	R	V	0.95	42.5	18.9	0	2	2	0	2	1171.62	318	327	x
aClassified by GO Term: Membrane (ID 16020)

## Sheet: Sheet1
Retinal guanylyl cyclase 1 OS=Bos taurus GN=GUCY2D PE=1 SV=1													Supplemental Table 1: OS Proteins Identified
Retinal guanylyl cyclase 1 OS=Bos taurus GN=GUCY2D PE=1 SV=1
Retinal guanylyl cyclase 1 OS=Bos taurus GN=GUCY2D PE=1 SV=1													75 proteins
Retinal guanylyl cyclase 1 OS=Bos taurus GN=GUCY2D PE=1 SV=1
Retinal guanylyl cyclase 1 OS=Bos taurus GN=GUCY2D PE=1 SV=1													CRITERIA FOR PROTEIN IDENTIFICATION-- Scaffold (version Scaffold_2_06_00, Proteome Software Inc., Portland, OR) was used to validate MS/MS based peptide and protein identifications. Peptide identifications were accepted if they exceeded specific database search engine thresholds. Mascot identifications required at least ion scores must be greater than both the associated identity scores and 20. P…
Retinal guanylyl cyclase 1 OS=Bos taurus GN=GUCY2D PE=1 SV=1													New8hL_experiement, Protein report created on 12/08/2009
Retinal guanylyl cyclase 1 OS=Bos taurus GN=GUCY2D PE=1 SV=1													Experiment: New8hL_experiement
Retinal guanylyl cyclase 1 OS=Bos taurus GN=GUCY2D PE=1 SV=1													Peak List Generator: extractmsn.exe
Retinal guanylyl cyclase 1 OS=Bos taurus GN=GUCY2D PE=1 SV=1													Database Name: SwissProt
Guanine nucleotide-binding protein G(I)/G(S)/G(T) subunit beta-2 OS=Bos taurus GN=GNB2 PE=2 SV=3													Version: 57
Guanine nucleotide-binding protein G(I)/G(S)/G(T) subunit beta-2 OS=Bos taurus GN=GNB2 PE=2 SV=3													Taxonomy: Rodentia
Guanine nucleotide-binding protein G(I)/G(S)/G(T) subunit beta-2 OS=Bos taurus GN=GNB2 PE=2 SV=3													Number of Proteins: 25165
Guanine nucleotide-binding protein G(I)/G(S)/G(T) subunit beta-2 OS=Bos taurus GN=GNB2 PE=2 SV=3													Search Engine Set: 1 Search Engine
Guanine nucleotide-binding protein G(I)/G(S)/G(T) subunit beta-2 OS=Bos taurus GN=GNB2 PE=2 SV=3													Search Engine: Mascot
Guanine nucleotide-binding protein G(I)/G(S)/G(T) subunit beta-2 OS=Bos taurus GN=GNB2 PE=2 SV=3													Version: Mascot
Cytochrome b-c1 complex subunit 1, mitochondrial OS=Bos taurus GN=UQCRC1 PE=1 SV=2													Samples: All Samples
Cytochrome b-c1 complex subunit 1, mitochondrial OS=Bos taurus GN=UQCRC1 PE=1 SV=2													Fragment Tolerance: 1.00 Da (Monoisotopic)
Cytochrome b-c1 complex subunit 1, mitochondrial OS=Bos taurus GN=UQCRC1 PE=1 SV=2													Parent Tolerance: 10.0 PPM (Monoisotopic)
NADH-ubiquinone oxidoreductase 75 kDa subunit, mitochondrial OS=Bos taurus GN=NDUFS1 PE=1 SV=1													Fixed Modifications: +57 on C (Carbamidomethyl)
NADH-ubiquinone oxidoreductase 75 kDa subunit, mitochondrial OS=Bos taurus GN=NDUFS1 PE=1 SV=1													Variable Modifications: +2 on c (O18), +4 on c (double_O18), +16 on M (Oxidation), +32 on M (Sulphone) (sampleB.RAW (F018801), sampleC.RAW (F018806), sampleA.RAW (F018802), sampleD.RAW (F018809)), +42 on n (Acetyl)
NADH-ubiquinone oxidoreductase 75 kDa subunit, mitochondrial OS=Bos taurus GN=NDUFS1 PE=1 SV=1													Database: the uniprot_sprot database (selected for Rodentia, unknown version, 25165 entries)
NADH-ubiquinone oxidoreductase 75 kDa subunit, mitochondrial OS=Bos taurus GN=NDUFS1 PE=1 SV=1													Digestion Enzyme: Trypsin
Cytochrome c oxidase subunit 5A, mitochondrial OS=Bos taurus GN=COX5A PE=1 SV=2													Max Missed Cleavages: 1
Cytochrome c oxidase subunit 5A, mitochondrial OS=Bos taurus GN=COX5A PE=1 SV=2													Scaffold Version: Scaffold_2_06_00
Cytochrome c oxidase subunit 5A, mitochondrial OS=Bos taurus GN=COX5A PE=1 SV=2													Peptide Thresholds: Mascot: ion scores must be greater than both the associated identity scores and 20
Creatine kinase U-type, mitochondrial OS=Bos taurus GN=CKMT1 PE=2 SV=1													Protein Thresholds: 2 peptides minimum
Creatine kinase U-type, mitochondrial OS=Bos taurus GN=CKMT1 PE=2 SV=1
Prohibitin OS=Bos taurus GN=PHB PE=2 SV=1
Prohibitin OS=Bos taurus GN=PHB PE=2 SV=1
Prohibitin OS=Bos taurus GN=PHB PE=2 SV=1
Voltage-dependent anion-selective channel protein 1 OS=Bos taurus GN=VDAC1 PE=1 SV=3
Voltage-dependent anion-selective channel protein 1 OS=Bos taurus GN=VDAC1 PE=1 SV=3
Voltage-dependent anion-selective channel protein 1 OS=Bos taurus GN=VDAC1 PE=1 SV=3
Voltage-dependent anion-selective channel protein 1 OS=Bos taurus GN=VDAC1 PE=1 SV=3
Voltage-dependent anion-selective channel protein 1 OS=Bos taurus GN=VDAC1 PE=1 SV=3
Voltage-dependent anion-selective channel protein 1 OS=Bos taurus GN=VDAC1 PE=1 SV=3
Guanine nucleotide-binding protein G(T) subunit gamma-T1 OS=Bos taurus GN=GNGT1 PE=1 SV=2
Guanine nucleotide-binding protein G(T) subunit gamma-T1 OS=Bos taurus GN=GNGT1 PE=1 SV=2
Guanine nucleotide-binding protein G(T) subunit gamma-T1 OS=Bos taurus GN=GNGT1 PE=1 SV=2
Guanine nucleotide-binding protein G(T) subunit gamma-T1 OS=Bos taurus GN=GNGT1 PE=1 SV=2
Guanine nucleotide-binding protein G(T) subunit gamma-T1 OS=Bos taurus GN=GNGT1 PE=1 SV=2
Trypsin OS=Sus scrofa PE=1 SV=1
Trypsin OS=Sus scrofa PE=1 SV=1
Trypsin OS=Sus scrofa PE=1 SV=1
Red-sensitive opsin OS=Bos taurus GN=OPN1LW PE=2 SV=1
Red-sensitive opsin OS=Bos taurus GN=OPN1LW PE=2 SV=1
Red-sensitive opsin OS=Bos taurus GN=OPN1LW PE=2 SV=1
Ras-related protein Rab-11B OS=Bos taurus GN=RAB11B PE=2 SV=3
Ras-related protein Rab-11B OS=Bos taurus GN=RAB11B PE=2 SV=3
Ras-related protein Rab-11B OS=Bos taurus GN=RAB11B PE=2 SV=3
Ras-related protein Rab-11B OS=Bos taurus GN=RAB11B PE=2 SV=3
Sodium/potassium/calcium exchanger 1 OS=Bos taurus GN=SLC24A1 PE=1 SV=2
Sodium/potassium/calcium exchanger 1 OS=Bos taurus GN=SLC24A1 PE=1 SV=2
Sodium/potassium/calcium exchanger 1 OS=Bos taurus GN=SLC24A1 PE=1 SV=2
Sodium/potassium/calcium exchanger 1 OS=Bos taurus GN=SLC24A1 PE=1 SV=2
Sodium/potassium/calcium exchanger 1 OS=Bos taurus GN=SLC24A1 PE=1 SV=2
Actin, cytoplasmic 1 OS=Bos taurus GN=ACTB PE=1 SV=1
Actin, cytoplasmic 1 OS=Bos taurus GN=ACTB PE=1 SV=1
Actin, cytoplasmic 1 OS=Bos taurus GN=ACTB PE=1 SV=1
Actin, cytoplasmic 1 OS=Bos taurus GN=ACTB PE=1 SV=1
Actin, cytoplasmic 1 OS=Bos taurus GN=ACTB PE=1 SV=1
Actin, cytoplasmic 1 OS=Bos taurus GN=ACTB PE=1 SV=1
Rod outer segment membrane protein 1 OS=Bos taurus GN=ROM1 PE=2 SV=2
Rod outer segment membrane protein 1 OS=Bos taurus GN=ROM1 PE=2 SV=2
Rod outer segment membrane protein 1 OS=Bos taurus GN=ROM1 PE=2 SV=2
Rod outer segment membrane protein 1 OS=Bos taurus GN=ROM1 PE=2 SV=2
Rod outer segment membrane protein 1 OS=Bos taurus GN=ROM1 PE=2 SV=2
Recoverin OS=Bos taurus GN=RCVRN PE=1 SV=3
Recoverin OS=Bos taurus GN=RCVRN PE=1 SV=3
Recoverin OS=Bos taurus GN=RCVRN PE=1 SV=3
Recoverin OS=Bos taurus GN=RCVRN PE=1 SV=3
Recoverin OS=Bos taurus GN=RCVRN PE=1 SV=3
Recoverin OS=Bos taurus GN=RCVRN PE=1 SV=3
Recoverin OS=Bos taurus GN=RCVRN PE=1 SV=3
Heat shock cognate 71 kDa protein OS=Bos taurus GN=HSPA8 PE=1 SV=2
Heat shock cognate 71 kDa protein OS=Bos taurus GN=HSPA8 PE=1 SV=2
Heat shock cognate 71 kDa protein OS=Bos taurus GN=HSPA8 PE=1 SV=2
Heat shock cognate 71 kDa protein OS=Bos taurus GN=HSPA8 PE=1 SV=2
ADP/ATP translocase 3 OS=Bos taurus GN=SLC25A6 PE=2 SV=3
ADP/ATP translocase 3 OS=Bos taurus GN=SLC25A6 PE=2 SV=3
ADP/ATP translocase 3 OS=Bos taurus GN=SLC25A6 PE=2 SV=3
ADP/ATP translocase 3 OS=Bos taurus GN=SLC25A6 PE=2 SV=3
ADP/ATP translocase 3 OS=Bos taurus GN=SLC25A6 PE=2 SV=3
NADH dehydrogenase [ubiquinone] 1 subunit C2 OS=Bos taurus GN=NDUFC2 PE=1 SV=1
NADH dehydrogenase [ubiquinone] 1 subunit C2 OS=Bos taurus GN=NDUFC2 PE=1 SV=1
Rhodopsin OS=Bos taurus GN=RHO PE=1 SV=1
Rhodopsin OS=Bos taurus GN=RHO PE=1 SV=1
Rhodopsin OS=Bos taurus GN=RHO PE=1 SV=1
Rhodopsin OS=Bos taurus GN=RHO PE=1 SV=1
Rhodopsin OS=Bos taurus GN=RHO PE=1 SV=1
NADH dehydrogenase [ubiquinone] 1 beta subcomplex subunit 10 OS=Bos taurus GN=NDUFB10 PE=1 SV=2
NADH dehydrogenase [ubiquinone] 1 beta subcomplex subunit 10 OS=Bos taurus GN=NDUFB10 PE=1 SV=2
Voltage-dependent anion-selective channel protein 3 OS=Bos taurus GN=VDAC3 PE=2 SV=1
Voltage-dependent anion-selective channel protein 3 OS=Bos taurus GN=VDAC3 PE=2 SV=1
Voltage-dependent anion-selective channel protein 3 OS=Bos taurus GN=VDAC3 PE=2 SV=1
Guanine nucleotide-binding protein G(t) subunit alpha-1 OS=Bos taurus GN=GNAT1 PE=1 SV=3
Guanine nucleotide-binding protein G(t) subunit alpha-1 OS=Bos taurus GN=GNAT1 PE=1 SV=3
Guanine nucleotide-binding protein G(t) subunit alpha-1 OS=Bos taurus GN=GNAT1 PE=1 SV=3
Guanine nucleotide-binding protein G(t) subunit alpha-1 OS=Bos taurus GN=GNAT1 PE=1 SV=3
Guanine nucleotide-binding protein G(t) subunit alpha-1 OS=Bos taurus GN=GNAT1 PE=1 SV=3
Guanine nucleotide-binding protein G(t) subunit alpha-1 OS=Bos taurus GN=GNAT1 PE=1 SV=3
Guanine nucleotide-binding protein G(t) subunit alpha-1 OS=Bos taurus GN=GNAT1 PE=1 SV=3
Guanine nucleotide-binding protein G(t) subunit alpha-1 OS=Bos taurus GN=GNAT1 PE=1 SV=3
Guanine nucleotide-binding protein G(t) subunit alpha-1 OS=Bos taurus GN=GNAT1 PE=1 SV=3
Elongation factor 1-alpha 1 OS=Bos taurus GN=EEF1A1 PE=2 SV=1
Elongation factor 1-alpha 1 OS=Bos taurus GN=EEF1A1 PE=2 SV=1
Elongation factor 1-alpha 1 OS=Bos taurus GN=EEF1A1 PE=2 SV=1
Elongation factor 1-alpha 1 OS=Bos taurus GN=EEF1A1 PE=2 SV=1
Elongation factor 1-alpha 1 OS=Bos taurus GN=EEF1A1 PE=2 SV=1
Guanine nucleotide-binding protein G(o) subunit alpha OS=Bos taurus GN=GNAO1 PE=1 SV=4
Guanine nucleotide-binding protein G(o) subunit alpha OS=Bos taurus GN=GNAO1 PE=1 SV=4
Guanine nucleotide-binding protein G(o) subunit alpha OS=Bos taurus GN=GNAO1 PE=1 SV=4
Guanine nucleotide-binding protein G(o) subunit alpha OS=Bos taurus GN=GNAO1 PE=1 SV=4
Guanine nucleotide-binding protein G(o) subunit alpha OS=Bos taurus GN=GNAO1 PE=1 SV=4
Tubulin beta chain OS=Sus scrofa PE=1 SV=1
Tubulin beta chain OS=Sus scrofa PE=1 SV=1
Tubulin beta chain OS=Sus scrofa PE=1 SV=1
Tubulin beta chain OS=Sus scrofa PE=1 SV=1
Tubulin beta chain OS=Sus scrofa PE=1 SV=1
Tubulin beta chain OS=Sus scrofa PE=1 SV=1
Tubulin beta chain OS=Sus scrofa PE=1 SV=1
Tubulin beta chain OS=Sus scrofa PE=1 SV=1
Tubulin beta chain OS=Sus scrofa PE=1 SV=1
Tubulin beta chain OS=Sus scrofa PE=1 SV=1
Retinol-binding protein 3 OS=Bos taurus GN=RBP3 PE=1 SV=1
Retinol-binding protein 3 OS=Bos taurus GN=RBP3 PE=1 SV=1
Retinol-binding protein 3 OS=Bos taurus GN=RBP3 PE=1 SV=1
Retinol-binding protein 3 OS=Bos taurus GN=RBP3 PE=1 SV=1
Retinol-binding protein 3 OS=Bos taurus GN=RBP3 PE=1 SV=1
Retinol-binding protein 3 OS=Bos taurus GN=RBP3 PE=1 SV=1
Retinol-binding protein 3 OS=Bos taurus GN=RBP3 PE=1 SV=1
Retinol-binding protein 3 OS=Bos taurus GN=RBP3 PE=1 SV=1
Retinol-binding protein 3 OS=Bos taurus GN=RBP3 PE=1 SV=1
Tubulin beta-2B chain OS=Bos taurus GN=TUBB2B PE=1 SV=2
Tubulin beta-2B chain OS=Bos taurus GN=TUBB2B PE=1 SV=2
Tubulin beta-2B chain OS=Bos taurus GN=TUBB2B PE=1 SV=2
Tubulin beta-2B chain OS=Bos taurus GN=TUBB2B PE=1 SV=2
Tubulin beta-2B chain OS=Bos taurus GN=TUBB2B PE=1 SV=2
Tubulin beta-2B chain OS=Bos taurus GN=TUBB2B PE=1 SV=2
Tubulin beta-2B chain OS=Bos taurus GN=TUBB2B PE=1 SV=2
Tubulin beta-2B chain OS=Bos taurus GN=TUBB2B PE=1 SV=2
Tubulin beta-2B chain OS=Bos taurus GN=TUBB2B PE=1 SV=2
Hemoglobin subunit alpha-1 OS=Bos mutus grunniens PE=1 SV=1
Hemoglobin subunit alpha-1 OS=Bos mutus grunniens PE=1 SV=1
Syntaxin-binding protein 1 OS=Bos taurus GN=STXBP1 PE=1 SV=1
Syntaxin-binding protein 1 OS=Bos taurus GN=STXBP1 PE=1 SV=1
Syntaxin-binding protein 1 OS=Bos taurus GN=STXBP1 PE=1 SV=1
Syntaxin-binding protein 1 OS=Bos taurus GN=STXBP1 PE=1 SV=1
ATP synthase subunit O, mitochondrial OS=Bos taurus GN=ATP5O PE=1 SV=2
ATP synthase subunit O, mitochondrial OS=Bos taurus GN=ATP5O PE=1 SV=2
ATP synthase subunit O, mitochondrial OS=Bos taurus GN=ATP5O PE=1 SV=2
Prohibitin-2 OS=Bos taurus GN=PHB2 PE=2 SV=1
Prohibitin-2 OS=Bos taurus GN=PHB2 PE=2 SV=1
Tubulin beta-3 chain OS=Bos taurus GN=TUBB3 PE=2 SV=1
Tubulin beta-3 chain OS=Bos taurus GN=TUBB3 PE=2 SV=1
Tubulin beta-3 chain OS=Bos taurus GN=TUBB3 PE=2 SV=1
Tubulin beta-3 chain OS=Bos taurus GN=TUBB3 PE=2 SV=1
Tubulin beta-3 chain OS=Bos taurus GN=TUBB3 PE=2 SV=1
Tubulin beta-3 chain OS=Bos taurus GN=TUBB3 PE=2 SV=1
Tubulin beta-3 chain OS=Bos taurus GN=TUBB3 PE=2 SV=1
Tubulin beta-3 chain OS=Bos taurus GN=TUBB3 PE=2 SV=1
Sodium/potassium-transporting ATPase subunit alpha-1 OS=Bos taurus GN=ATP1A1 PE=2 SV=1
Sodium/potassium-transporting ATPase subunit alpha-1 OS=Bos taurus GN=ATP1A1 PE=2 SV=1
Sodium/potassium-transporting ATPase subunit alpha-1 OS=Bos taurus GN=ATP1A1 PE=2 SV=1
Sodium/potassium-transporting ATPase subunit alpha-1 OS=Bos taurus GN=ATP1A1 PE=2 SV=1
Sodium/potassium-transporting ATPase subunit alpha-1 OS=Bos taurus GN=ATP1A1 PE=2 SV=1
Sodium/potassium-transporting ATPase subunit alpha-1 OS=Bos taurus GN=ATP1A1 PE=2 SV=1
Sodium/potassium-transporting ATPase subunit alpha-1 OS=Bos taurus GN=ATP1A1 PE=2 SV=1
Peripherin-2 OS=Bos taurus GN=PRPH2 PE=1 SV=1
Peripherin-2 OS=Bos taurus GN=PRPH2 PE=1 SV=1
Peripherin-2 OS=Bos taurus GN=PRPH2 PE=1 SV=1
Peripherin-2 OS=Bos taurus GN=PRPH2 PE=1 SV=1
Peripherin-2 OS=Bos taurus GN=PRPH2 PE=1 SV=1
Peripherin-2 OS=Bos taurus GN=PRPH2 PE=1 SV=1
cGMP-gated cation channel alpha-1 OS=Bos taurus GN=CNGA1 PE=1 SV=1
cGMP-gated cation channel alpha-1 OS=Bos taurus GN=CNGA1 PE=1 SV=1
cGMP-gated cation channel alpha-1 OS=Bos taurus GN=CNGA1 PE=1 SV=1
cGMP-gated cation channel alpha-1 OS=Bos taurus GN=CNGA1 PE=1 SV=1
cGMP-gated cation channel alpha-1 OS=Bos taurus GN=CNGA1 PE=1 SV=1
Excitatory amino acid transporter 1 OS=Bos taurus GN=SLC1A3 PE=2 SV=1
Excitatory amino acid transporter 1 OS=Bos taurus GN=SLC1A3 PE=2 SV=1
Excitatory amino acid transporter 1 OS=Bos taurus GN=SLC1A3 PE=2 SV=1
Tubulin alpha-1B chain OS=Bos taurus PE=1 SV=2
Tubulin alpha-1B chain OS=Bos taurus PE=1 SV=2
Tubulin alpha-1B chain OS=Bos taurus PE=1 SV=2
Tubulin alpha-1B chain OS=Bos taurus PE=1 SV=2
Tubulin alpha-1B chain OS=Bos taurus PE=1 SV=2
Tubulin alpha-1B chain OS=Bos taurus PE=1 SV=2
Tubulin alpha-1B chain OS=Bos taurus PE=1 SV=2
Tubulin alpha-1B chain OS=Bos taurus PE=1 SV=2
Tubulin alpha-1B chain OS=Bos taurus PE=1 SV=2
Tubulin alpha-1B chain OS=Bos taurus PE=1 SV=2
Tubulin alpha-1B chain OS=Bos taurus PE=1 SV=2
Sodium/potassium-transporting ATPase subunit beta-2 OS=Ochotona curzoniae GN=ATP1B2 PE=2 SV=1
Sodium/potassium-transporting ATPase subunit beta-2 OS=Ochotona curzoniae GN=ATP1B2 PE=2 SV=1
Phosphate carrier protein, mitochondrial OS=Bos taurus GN=SLC25A3 PE=1 SV=1
Phosphate carrier protein, mitochondrial OS=Bos taurus GN=SLC25A3 PE=1 SV=1
Phosphate carrier protein, mitochondrial OS=Bos taurus GN=SLC25A3 PE=1 SV=1
Rod cGMP-specific 3',5'-cyclic phosphodiesterase subunit alpha OS=Bos taurus GN=PDE6A PE=1 SV=3
Rod cGMP-specific 3',5'-cyclic phosphodiesterase subunit alpha OS=Bos taurus GN=PDE6A PE=1 SV=3
Rod cGMP-specific 3',5'-cyclic phosphodiesterase subunit alpha OS=Bos taurus GN=PDE6A PE=1 SV=3
Rod cGMP-specific 3',5'-cyclic phosphodiesterase subunit alpha OS=Bos taurus GN=PDE6A PE=1 SV=3
Rod cGMP-specific 3',5'-cyclic phosphodiesterase subunit alpha OS=Bos taurus GN=PDE6A PE=1 SV=3
Rod cGMP-specific 3',5'-cyclic phosphodiesterase subunit alpha OS=Bos taurus GN=PDE6A PE=1 SV=3
Rod cGMP-specific 3',5'-cyclic phosphodiesterase subunit alpha OS=Bos taurus GN=PDE6A PE=1 SV=3
Rod cGMP-specific 3',5'-cyclic phosphodiesterase subunit alpha OS=Bos taurus GN=PDE6A PE=1 SV=3
Rod cGMP-specific 3',5'-cyclic phosphodiesterase subunit alpha OS=Bos taurus GN=PDE6A PE=1 SV=3
Rod cGMP-specific 3',5'-cyclic phosphodiesterase subunit alpha OS=Bos taurus GN=PDE6A PE=1 SV=3
Rod cGMP-specific 3',5'-cyclic phosphodiesterase subunit alpha OS=Bos taurus GN=PDE6A PE=1 SV=3
Rod cGMP-specific 3',5'-cyclic phosphodiesterase subunit alpha OS=Bos taurus GN=PDE6A PE=1 SV=3
Rod cGMP-specific 3',5'-cyclic phosphodiesterase subunit alpha OS=Bos taurus GN=PDE6A PE=1 SV=3
Rod cGMP-specific 3',5'-cyclic phosphodiesterase subunit alpha OS=Bos taurus GN=PDE6A PE=1 SV=3
Rod cGMP-specific 3',5'-cyclic phosphodiesterase subunit alpha OS=Bos taurus GN=PDE6A PE=1 SV=3
Rod cGMP-specific 3',5'-cyclic phosphodiesterase subunit alpha OS=Bos taurus GN=PDE6A PE=1 SV=3
ATP synthase subunit beta, mitochondrial OS=Bos taurus GN=ATP5B PE=1 SV=2
ATP synthase subunit beta, mitochondrial OS=Bos taurus GN=ATP5B PE=1 SV=2
ATP synthase subunit beta, mitochondrial OS=Bos taurus GN=ATP5B PE=1 SV=2
ATP synthase subunit beta, mitochondrial OS=Bos taurus GN=ATP5B PE=1 SV=2
ATP synthase subunit beta, mitochondrial OS=Bos taurus GN=ATP5B PE=1 SV=2
ATP synthase subunit beta, mitochondrial OS=Bos taurus GN=ATP5B PE=1 SV=2
ATP synthase subunit beta, mitochondrial OS=Bos taurus GN=ATP5B PE=1 SV=2
ATP synthase subunit beta, mitochondrial OS=Bos taurus GN=ATP5B PE=1 SV=2
ATP synthase subunit beta, mitochondrial OS=Bos taurus GN=ATP5B PE=1 SV=2
ATP synthase subunit beta, mitochondrial OS=Bos taurus GN=ATP5B PE=1 SV=2
ATP synthase subunit beta, mitochondrial OS=Bos taurus GN=ATP5B PE=1 SV=2
ATP synthase subunit beta, mitochondrial OS=Bos taurus GN=ATP5B PE=1 SV=2
ATP synthase subunit beta, mitochondrial OS=Bos taurus GN=ATP5B PE=1 SV=2
ATP synthase subunit beta, mitochondrial OS=Bos taurus GN=ATP5B PE=1 SV=2
Ras-related protein Rab-14 OS=Sus scrofa GN=RAB14 PE=2 SV=3
Ras-related protein Rab-14 OS=Sus scrofa GN=RAB14 PE=2 SV=3
Brain acid soluble protein 1 OS=Bos taurus GN=BASP1 PE=1 SV=3
Brain acid soluble protein 1 OS=Bos taurus GN=BASP1 PE=1 SV=3
Brain acid soluble protein 1 OS=Bos taurus GN=BASP1 PE=1 SV=3
Brain acid soluble protein 1 OS=Bos taurus GN=BASP1 PE=1 SV=3
Brain acid soluble protein 1 OS=Bos taurus GN=BASP1 PE=1 SV=3
Brain acid soluble protein 1 OS=Bos taurus GN=BASP1 PE=1 SV=3
Brain acid soluble protein 1 OS=Bos taurus GN=BASP1 PE=1 SV=3
Brain acid soluble protein 1 OS=Bos taurus GN=BASP1 PE=1 SV=3
Monocarboxylate transporter 1 OS=Bos taurus GN=SLC16A1 PE=2 SV=2
Monocarboxylate transporter 1 OS=Bos taurus GN=SLC16A1 PE=2 SV=2
Monocarboxylate transporter 1 OS=Bos taurus GN=SLC16A1 PE=2 SV=2
Monocarboxylate transporter 1 OS=Bos taurus GN=SLC16A1 PE=2 SV=2
Monocarboxylate transporter 1 OS=Bos taurus GN=SLC16A1 PE=2 SV=2
Ras-related protein Rab-3A OS=Bos taurus GN=RAB3A PE=1 SV=3
Ras-related protein Rab-3A OS=Bos taurus GN=RAB3A PE=1 SV=3
Calmodulin OS=Bos taurus GN=CALM PE=1 SV=2
Calmodulin OS=Bos taurus GN=CALM PE=1 SV=2
Calmodulin OS=Bos taurus GN=CALM PE=1 SV=2
Glutamine synthetase OS=Bos taurus GN=GLUL PE=2 SV=4
Glutamine synthetase OS=Bos taurus GN=GLUL PE=2 SV=4
Glutamine synthetase OS=Bos taurus GN=GLUL PE=2 SV=4
Glutamine synthetase OS=Bos taurus GN=GLUL PE=2 SV=4
Glyceraldehyde-3-phosphate dehydrogenase OS=Bos taurus GN=GAPDH PE=1 SV=4
Glyceraldehyde-3-phosphate dehydrogenase OS=Bos taurus GN=GAPDH PE=1 SV=4
Cytochrome b-c1 complex subunit 2, mitochondrial OS=Bos taurus GN=UQCRC2 PE=1 SV=2
Cytochrome b-c1 complex subunit 2, mitochondrial OS=Bos taurus GN=UQCRC2 PE=1 SV=2
Cytochrome b-c1 complex subunit 2, mitochondrial OS=Bos taurus GN=UQCRC2 PE=1 SV=2
Cytochrome b-c1 complex subunit 2, mitochondrial OS=Bos taurus GN=UQCRC2 PE=1 SV=2
Cytochrome b-c1 complex subunit 2, mitochondrial OS=Bos taurus GN=UQCRC2 PE=1 SV=2
ATP synthase subunit d, mitochondrial OS=Bos taurus GN=ATP5H PE=1 SV=2
ATP synthase subunit d, mitochondrial OS=Bos taurus GN=ATP5H PE=1 SV=2
Regulator of G-protein signaling 9 OS=Bos taurus GN=RGS9 PE=1 SV=1
Regulator of G-protein signaling 9 OS=Bos taurus GN=RGS9 PE=1 SV=1
Regulator of G-protein signaling 9 OS=Bos taurus GN=RGS9 PE=1 SV=1
Regulator of G-protein signaling 9 OS=Bos taurus GN=RGS9 PE=1 SV=1
NADH dehydrogenase [ubiquinone] 1 alpha subcomplex subunit 9, mitochondrial OS=Bos taurus GN=NDUFA9 PE=1 SV=1
NADH dehydrogenase [ubiquinone] 1 alpha subcomplex subunit 9, mitochondrial OS=Bos taurus GN=NDUFA9 PE=1 SV=1
Voltage-dependent anion-selective channel protein 2 OS=Bos taurus GN=VDAC2 PE=2 SV=2
Voltage-dependent anion-selective channel protein 2 OS=Bos taurus GN=VDAC2 PE=2 SV=2
Voltage-dependent anion-selective channel protein 2 OS=Bos taurus GN=VDAC2 PE=2 SV=2
Voltage-dependent anion-selective channel protein 2 OS=Bos taurus GN=VDAC2 PE=2 SV=2
Voltage-dependent anion-selective channel protein 2 OS=Bos taurus GN=VDAC2 PE=2 SV=2
Voltage-dependent anion-selective channel protein 2 OS=Bos taurus GN=VDAC2 PE=2 SV=2
Solute carrier family 2, facilitated glucose transporter member 1 OS=Bos taurus GN=SLC2A1 PE=2 SV=1
Solute carrier family 2, facilitated glucose transporter member 1 OS=Bos taurus GN=SLC2A1 PE=2 SV=1
Solute carrier family 2, facilitated glucose transporter member 1 OS=Bos taurus GN=SLC2A1 PE=2 SV=1
Regulator of G-protein signaling 9-binding protein OS=Bos taurus GN=RGS9BP PE=1 SV=2
Regulator of G-protein signaling 9-binding protein OS=Bos taurus GN=RGS9BP PE=1 SV=2
Regulator of G-protein signaling 9-binding protein OS=Bos taurus GN=RGS9BP PE=1 SV=2
S-arrestin OS=Bos taurus GN=SAG PE=1 SV=1
S-arrestin OS=Bos taurus GN=SAG PE=1 SV=1
S-arrestin OS=Bos taurus GN=SAG PE=1 SV=1
S-arrestin OS=Bos taurus GN=SAG PE=1 SV=1
S-arrestin OS=Bos taurus GN=SAG PE=1 SV=1
S-arrestin OS=Bos taurus GN=SAG PE=1 SV=1
S-arrestin OS=Bos taurus GN=SAG PE=1 SV=1
S-arrestin OS=Bos taurus GN=SAG PE=1 SV=1
S-arrestin OS=Bos taurus GN=SAG PE=1 SV=1
S-arrestin OS=Bos taurus GN=SAG PE=1 SV=1
S-arrestin OS=Bos taurus GN=SAG PE=1 SV=1
S-arrestin OS=Bos taurus GN=SAG PE=1 SV=1
S-arrestin OS=Bos taurus GN=SAG PE=1 SV=1
S-arrestin OS=Bos taurus GN=SAG PE=1 SV=1
S-arrestin OS=Bos taurus GN=SAG PE=1 SV=1
Tubulin alpha-4A chain OS=Bos taurus GN=TUBA4A PE=1 SV=2
Tubulin alpha-4A chain OS=Bos taurus GN=TUBA4A PE=1 SV=2
Tubulin alpha-4A chain OS=Bos taurus GN=TUBA4A PE=1 SV=2
Tubulin alpha-4A chain OS=Bos taurus GN=TUBA4A PE=1 SV=2
Tubulin alpha-4A chain OS=Bos taurus GN=TUBA4A PE=1 SV=2
Tubulin alpha-4A chain OS=Bos taurus GN=TUBA4A PE=1 SV=2
Tubulin alpha-4A chain OS=Bos taurus GN=TUBA4A PE=1 SV=2
Tubulin alpha-4A chain OS=Bos taurus GN=TUBA4A PE=1 SV=2
Alpha-enolase OS=Bos taurus GN=ENO1 PE=1 SV=4
Alpha-enolase OS=Bos taurus GN=ENO1 PE=1 SV=4
Alpha-enolase OS=Bos taurus GN=ENO1 PE=1 SV=4
60 kDa heat shock protein, mitochondrial OS=Bos taurus GN=HSPD1 PE=1 SV=2
60 kDa heat shock protein, mitochondrial OS=Bos taurus GN=HSPD1 PE=1 SV=2
Heat shock protein beta-1 OS=Bos taurus GN=HSPB1 PE=2 SV=1
Heat shock protein beta-1 OS=Bos taurus GN=HSPB1 PE=2 SV=1
Heat shock protein beta-1 OS=Bos taurus GN=HSPB1 PE=2 SV=1
Heat shock protein beta-1 OS=Bos taurus GN=HSPB1 PE=2 SV=1
Retinaldehyde-binding protein 1 OS=Bos taurus GN=RLBP1 PE=1 SV=4
Retinaldehyde-binding protein 1 OS=Bos taurus GN=RLBP1 PE=1 SV=4
Retinaldehyde-binding protein 1 OS=Bos taurus GN=RLBP1 PE=1 SV=4
Myristoylated alanine-rich C-kinase substrate OS=Bos taurus GN=MARCKS PE=1 SV=6
Myristoylated alanine-rich C-kinase substrate OS=Bos taurus GN=MARCKS PE=1 SV=6
Tubulin beta-5 chain OS=Bos taurus GN=TUBB5 PE=2 SV=1
Tubulin beta-5 chain OS=Bos taurus GN=TUBB5 PE=2 SV=1
Tubulin beta-5 chain OS=Bos taurus GN=TUBB5 PE=2 SV=1
Tubulin beta-5 chain OS=Bos taurus GN=TUBB5 PE=2 SV=1
Tubulin beta-5 chain OS=Bos taurus GN=TUBB5 PE=2 SV=1
Tubulin beta-5 chain OS=Bos taurus GN=TUBB5 PE=2 SV=1
Tubulin beta-5 chain OS=Bos taurus GN=TUBB5 PE=2 SV=1
Tubulin beta-5 chain OS=Bos taurus GN=TUBB5 PE=2 SV=1
Tubulin beta-5 chain OS=Bos taurus GN=TUBB5 PE=2 SV=1
NADH dehydrogenase [ubiquinone] 1 alpha subcomplex subunit 5 OS=Bos taurus GN=NDUFA5 PE=1 SV=3
NADH dehydrogenase [ubiquinone] 1 alpha subcomplex subunit 5 OS=Bos taurus GN=NDUFA5 PE=1 SV=3
Mitochondrial 2-oxoglutarate/malate carrier protein OS=Bos taurus GN=SLC25A11 PE=1 SV=3
Mitochondrial 2-oxoglutarate/malate carrier protein OS=Bos taurus GN=SLC25A11 PE=1 SV=3
Mitochondrial 2-oxoglutarate/malate carrier protein OS=Bos taurus GN=SLC25A11 PE=1 SV=3
Rod cGMP-specific 3',5'-cyclic phosphodiesterase subunit beta OS=Bos taurus GN=PDE6B PE=1 SV=1
Rod cGMP-specific 3',5'-cyclic phosphodiesterase subunit beta OS=Bos taurus GN=PDE6B PE=1 SV=1
Rod cGMP-specific 3',5'-cyclic phosphodiesterase subunit beta OS=Bos taurus GN=PDE6B PE=1 SV=1
Rod cGMP-specific 3',5'-cyclic phosphodiesterase subunit beta OS=Bos taurus GN=PDE6B PE=1 SV=1
Rod cGMP-specific 3',5'-cyclic phosphodiesterase subunit beta OS=Bos taurus GN=PDE6B PE=1 SV=1
Rod cGMP-specific 3',5'-cyclic phosphodiesterase subunit beta OS=Bos taurus GN=PDE6B PE=1 SV=1
Rod cGMP-specific 3',5'-cyclic phosphodiesterase subunit beta OS=Bos taurus GN=PDE6B PE=1 SV=1
Rod cGMP-specific 3',5'-cyclic phosphodiesterase subunit beta OS=Bos taurus GN=PDE6B PE=1 SV=1
Rod cGMP-specific 3',5'-cyclic phosphodiesterase subunit beta OS=Bos taurus GN=PDE6B PE=1 SV=1
Rod cGMP-specific 3',5'-cyclic phosphodiesterase subunit beta OS=Bos taurus GN=PDE6B PE=1 SV=1
Rod cGMP-specific 3',5'-cyclic phosphodiesterase subunit beta OS=Bos taurus GN=PDE6B PE=1 SV=1
Rod cGMP-specific 3',5'-cyclic phosphodiesterase subunit beta OS=Bos taurus GN=PDE6B PE=1 SV=1
Ras-related protein Rap-1A OS=Bos taurus GN=RAP1A PE=1 SV=1
Ras-related protein Rap-1A OS=Bos taurus GN=RAP1A PE=1 SV=1
Ras-related protein Rap-1A OS=Bos taurus GN=RAP1A PE=1 SV=1
Ubiquitin OS=Bos taurus GN=RPS27A PE=1 SV=1
Ubiquitin OS=Bos taurus GN=RPS27A PE=1 SV=1
Rhodopsin kinase OS=Bos taurus GN=GRK1 PE=1 SV=1
Rhodopsin kinase OS=Bos taurus GN=GRK1 PE=1 SV=1
Rhodopsin kinase OS=Bos taurus GN=GRK1 PE=1 SV=1
Rhodopsin kinase OS=Bos taurus GN=GRK1 PE=1 SV=1
Rhodopsin kinase OS=Bos taurus GN=GRK1 PE=1 SV=1
Rhodopsin kinase OS=Bos taurus GN=GRK1 PE=1 SV=1
Rhodopsin kinase OS=Bos taurus GN=GRK1 PE=1 SV=1
Cyclic nucleotide-gated cation channel beta-1 OS=Bos taurus GN=CNGB1 PE=1 SV=1
Cyclic nucleotide-gated cation channel beta-1 OS=Bos taurus GN=CNGB1 PE=1 SV=1
Cyclic nucleotide-gated cation channel beta-1 OS=Bos taurus GN=CNGB1 PE=1 SV=1
Cyclic nucleotide-gated cation channel beta-1 OS=Bos taurus GN=CNGB1 PE=1 SV=1
Cyclic nucleotide-gated cation channel beta-1 OS=Bos taurus GN=CNGB1 PE=1 SV=1
Cyclic nucleotide-gated cation channel beta-1 OS=Bos taurus GN=CNGB1 PE=1 SV=1
Cyclic nucleotide-gated cation channel beta-1 OS=Bos taurus GN=CNGB1 PE=1 SV=1
Cyclic nucleotide-gated cation channel beta-1 OS=Bos taurus GN=CNGB1 PE=1 SV=1
Cyclic nucleotide-gated cation channel beta-1 OS=Bos taurus GN=CNGB1 PE=1 SV=1
Cyclic nucleotide-gated cation channel beta-1 OS=Bos taurus GN=CNGB1 PE=1 SV=1
Hemoglobin subunit beta OS=Bos taurus GN=HBB PE=1 SV=1
Hemoglobin subunit beta OS=Bos taurus GN=HBB PE=1 SV=1
Hemoglobin subunit beta OS=Bos taurus GN=HBB PE=1 SV=1
L-lactate dehydrogenase B chain OS=Bos taurus GN=LDHB PE=2 SV=4
L-lactate dehydrogenase B chain OS=Bos taurus GN=LDHB PE=2 SV=4
ATP synthase subunit gamma, mitochondrial OS=Bos taurus GN=ATP5C1 PE=1 SV=3
ATP synthase subunit gamma, mitochondrial OS=Bos taurus GN=ATP5C1 PE=1 SV=3
ATP synthase subunit gamma, mitochondrial OS=Bos taurus GN=ATP5C1 PE=1 SV=3
ATP synthase subunit gamma, mitochondrial OS=Bos taurus GN=ATP5C1 PE=1 SV=3
ATP synthase subunit gamma, mitochondrial OS=Bos taurus GN=ATP5C1 PE=1 SV=3
ATP synthase subunit b, mitochondrial OS=Bos taurus GN=ATP5F1 PE=1 SV=2
ATP synthase subunit b, mitochondrial OS=Bos taurus GN=ATP5F1 PE=1 SV=2
Mitochondrial glutamate carrier 1 OS=Bos taurus GN=SLC25A22 PE=2 SV=1
Mitochondrial glutamate carrier 1 OS=Bos taurus GN=SLC25A22 PE=2 SV=1
ATP synthase subunit alpha, mitochondrial OS=Bos taurus GN=ATP5A1 PE=1 SV=1
ATP synthase subunit alpha, mitochondrial OS=Bos taurus GN=ATP5A1 PE=1 SV=1
ATP synthase subunit alpha, mitochondrial OS=Bos taurus GN=ATP5A1 PE=1 SV=1
ATP synthase subunit alpha, mitochondrial OS=Bos taurus GN=ATP5A1 PE=1 SV=1
ATP synthase subunit alpha, mitochondrial OS=Bos taurus GN=ATP5A1 PE=1 SV=1
ATP synthase subunit alpha, mitochondrial OS=Bos taurus GN=ATP5A1 PE=1 SV=1
ATP synthase subunit alpha, mitochondrial OS=Bos taurus GN=ATP5A1 PE=1 SV=1
ATP synthase subunit alpha, mitochondrial OS=Bos taurus GN=ATP5A1 PE=1 SV=1
ATP synthase subunit alpha, mitochondrial OS=Bos taurus GN=ATP5A1 PE=1 SV=1
ATP synthase subunit alpha, mitochondrial OS=Bos taurus GN=ATP5A1 PE=1 SV=1
ATP synthase subunit alpha, mitochondrial OS=Bos taurus GN=ATP5A1 PE=1 SV=1
ATP synthase subunit alpha, mitochondrial OS=Bos taurus GN=ATP5A1 PE=1 SV=1
ATP synthase subunit alpha, mitochondrial OS=Bos taurus GN=ATP5A1 PE=1 SV=1
ATP synthase subunit alpha, mitochondrial OS=Bos taurus GN=ATP5A1 PE=1 SV=1
ATP synthase subunit alpha, mitochondrial OS=Bos taurus GN=ATP5A1 PE=1 SV=1
ATP synthase subunit alpha, mitochondrial OS=Bos taurus GN=ATP5A1 PE=1 SV=1
ATP synthase subunit alpha, mitochondrial OS=Bos taurus GN=ATP5A1 PE=1 SV=1
ATP synthase subunit alpha, mitochondrial OS=Bos taurus GN=ATP5A1 PE=1 SV=1
Rhodopsin OS=Mesoplodon bidens GN=RHO PE=1 SV=1
Rhodopsin OS=Mesoplodon bidens GN=RHO PE=1 SV=1
Rhodopsin OS=Mesoplodon bidens GN=RHO PE=1 SV=1
Rhodopsin OS=Mesoplodon bidens GN=RHO PE=1 SV=1
Guanine nucleotide-binding protein subunit beta-5 OS=Oryctolagus cuniculus GN=GNB5 PE=2 SV=1
Guanine nucleotide-binding protein subunit beta-5 OS=Oryctolagus cuniculus GN=GNB5 PE=2 SV=1
Guanine nucleotide-binding protein subunit beta-5 OS=Oryctolagus cuniculus GN=GNB5 PE=2 SV=1
